1 **Speciation in a biodiversity hotspot: phylogenetic relationships, species delimitation,**  
2 **and divergence times of the Patagonian ground frogs of *Eupsophus roseus* group**  
3 **(Alsodidae)**

4  
5 Elkin Y. Suárez-Villota, Camila A. Quercia, Leila M. Díaz, Victoria A. Vera-Sovier, José J.  
6 Nuñez\*

7  
8 *Instituto de Ciencias Marinas y Limnológicas, Universidad Austral de Chile, Valdivia,*  
9 *Chile.*

10  
11 **Abstract**

12  
13 The alsodid ground frogs genus *Eupsophus* is divided into the *roseus* (2n=30) and  
14 *vertebralis* (2n=28) groups, distributed throughout the temperate *Nothofagus* forests of  
15 South America. Currently, the *roseus* group is composed by four species, while the  
16 *vertebralis* group consists of two. Phylogenetic relationships and species delimitation  
17 within each group are controversial. In fact, previous analyses considered that *roseus* group  
18 was composed between four to nine species. In this work, we evaluated phylogenetic  
19 relationships, diversification times, and species delimitation within *roseus* group using a  
20 multi-locus dataset. For this purpose, mitochondrial (D-loop, Cyt *b*, and COI) and nuclear  
21 (POMC and CRYBA1) partial sequences, were amplified from 164 individuals,  
22 representing all species. Maximum Likelihood (ML) and Bayesian approaches were used to  
23 reconstruct phylogenetic relationships. Species tree was estimated using BEAST and  
24 singular value decomposition scores for species quartets (SVDquartets). Species limits  
25 were evaluated with six coalescent approaches. Diversification times were estimated using  
26 mitochondrial and nuclear rates with LogNormal relaxed clock in BEAST. Nine well-  
27 supported monophyletic lineages were recovered in Bayesian, ML, and SVDquartets,  
28 including eight named species and a lineage composed by specimens from Villarrica  
29 population (Bootstrap: >90, PP:> 0.9). Single-locus species delimitation analyses  
30 overestimated the species number in *E. migueli*, *E. calcaratus* and *E. roseus* lineages, while  
31 multi-locus analyses recovered as species the nine lineages observed in phylogenetic  
32 analyses (>0.95). It is hypothesized that *Eupsophus* diversification occurred during Mid-  
33 Pleistocene (0.42-0.14 Mya), with most species originated after of the Last Southern  
34 Patagonian Glaciation (0.18 Mya). Our results revitalize the hypothesis that *E. roseus* group  
35 is composed by eight species and support to Villarrica lineage as a new putative species.

36  
37 Key-words: amphibians, coalescent models, interspecific genetic variation, species  
38 boundaries, multi-locus approaches.

39  
40 \*Correspondent: [jjnunezn@gmail.com](mailto:jjnunezn@gmail.com)

41  
42 **Introduction**

43  
44 From the operational point of view, the notion of biodiversity encompasses several  
45 different levels of biological organization, from the species' make up genetic to ecosystems  
46 and landscapes, in which the species is the most significant unit. Species are used for  
47 comparisons in almost all biological fields including ecology, evolution, and conservation

48 [1–3]; no doubt the central unit for systematics is also the species [4]. Furthermore,  
49 biodiversity hotspots are selected on the basis of the species they possess, conservation  
50 schemes are assessed on how many species are preserved, and conservation legislation and  
51 politics are focused on species preservation [5,6].

52 Although the importance of species concepts debate [7,8], and that the species as  
53 taxonomic hierarchy is also considered a fundamental topic in biology [9], it is broadly  
54 accepted that species are best conceptualized as dynamic entities, connected by "grey  
55 zones" where their delimitation will remain inherently ambiguous [4,10]. Under this  
56 perspective, species delimitation, i.e. the act of identifying species-level biological diversity  
57 [11], is particularly challenging in actively radiating groups composed of recently diverged  
58 lineages. The difficulty lies in the fact that recently separated species are less likely to  
59 possess all or even many of the diagnosable characters such as phenetic distinctiveness,  
60 intrinsic reproductive incompatibility, ecological uniqueness, or reciprocal monophyly, that  
61 constitute operational criteria for their delimitation [4,12]. Thus, hypotheses of the  
62 boundaries of recently diverged species can remain unclear due to incomplete lineage  
63 sorting, introgression, complex of cryptic species that cannot be distinguished by  
64 morphology alone, sampling deficiencies, or different taxonomic practices [2,4].

65 As genetic data have become easier and less expensive to gather, the field of species  
66 delimitation has experienced an explosion in the number and variety of methodological  
67 approaches [3,11,13–15]. These new approaches proceed by evaluating models of lineage  
68 composition under a phylogenetic framework that implements a coalescent model to  
69 delimit species [11,16]. In this regard, these approaches estimate the phylogeny while  
70 allowing for the action of population-level processes, such as genetic drift in combination  
71 with migration, expansion, population divergence, or combinations of these processes [17–  
72 19]. Thus, species delimitation models can involve population size parameters (i.e.  $\theta$ s for  
73 the extant species and common ancestors), parameters for the divergence times ( $\tau$ ), and  
74 coalescent models specifying the distribution of gene trees at different loci [20–24].

75 Some methodological approaches to species delimitation use single-locus sequence  
76 information itself as the primary information source for establishing group membership and  
77 defining species boundaries [25–27]. Other methods are designed to analyze multi-locus  
78 data sets and require a priori assignment of individuals to species categories [19,28,29]. The  
79 performance of species delimitation methods are quantified by the number of different  
80 species recognized in each case and the congruence with data at hand as life history,  
81 geographical distribution, morphology, and behavior [13,30]. Although, there is difficulty  
82 to integrate genetic and non-genetic data to increase the efficacy of species detection [31],  
83 there are available methods to measure the congruence and resolving power among species  
84 delimitation approaches [32].

85 Patagonian landscape history offers exceptional opportunities to investigate  
86 diversification and promote conservation strategies by studying past, present, and future of  
87 evolutionary processes using amphibians as model study. In this region, the amphibian  
88 fauna of Chile is not particularly diverse (60 species; [33]), but includes 10 endemic genera,  
89 some of them having one or few species (e. g. *Calyptocephalella*, *Chaltenobatrachus*,  
90 *Hylorina*, *Insuetophrynus*, *Rhinoderma*), to as many as 18 (*Alsodes*). Among these  
91 amphibians are frogs of the genus *Eupsophus* Fitzinger 1843. This taxon includes currently  
92 six species distributed almost throughout the temperate *Nothofagus* forest of South America  
93 [33]. Nevertheless, *Eupsophus* have puzzled frog systematics for decades [34–37], and a  
94 clear consensus has not yet been reached regarding the number of species that make up this

95 genus [38–40]. In fact, the genus *Eupsophus* was classically divided into two groups with  
96 following species [34,41]: 1) *roseus* group, composed of *E. altor*, *E. roseus*, *E. calcaratus*,  
97 *E. contulmoensis*, *E. insularis*, *E. septentrionalis*, *E. migueli* and *E. nahuelbutensis*. All of  
98 them with 30 chromosomes, and whose individuals have a body size of 34–42 mm (snout-  
99 vent distance) [42]; and 2) the *vertebralis* group, composed of *E. vertebralis* and *E.*  
100 *emiliopugini*, both species with 28 chromosomes and individuals with a body size of 50–59  
101 mm (snout-vent distance) [42]. Nevertheless, recently molecular analyses within *roseus*  
102 group synonymized *E. altor* with *E. migueli* as well as *E. contulmoensis*, *E. septentrionalis*,  
103 and *E. nahuelbutensis* with *E. roseus* [35]. Therefore, currently the *roseus* group is  
104 composed by four species: *E. migueli*, *E. insularis*, *E. roseus* and *E. calcaratus* [33].

105 Here, we present phylogenetic and species delimitation of the *roseus* group, using  
106 164 new samples from all species covering most of their distribution range. We used three  
107 mitochondrial and two nuclear markers, three of them are different to those used by Blotto  
108 et al [34] and Correa et al [35] [Control Region (D-loop), Proopiomelanocortin (POMC), and  
109  $\beta$  Crystallin A1 (CRYBA1)]. These molecular dataset are used to carry out phylogenetic  
110 reconstructions and an extensive number of single- and multi-locus species delimitation  
111 methods. Species trees and diversification times were estimate to support phylogenetic and  
112 species boundaries inferences. New samples, different markers, and multiple bioinformatic  
113 techniques allowed us to test, in an independent way, phylogenetic and species delimitation  
114 hypothesis in the *roseus* group.

115

## 116 **Materials and Methods**

117

### 118 *Ethics Statement*

119 This study was carried out in strict accordance with the recommendations of the  
120 Bioethics and Biosecurity Committee of the Universidad Austral de Chile (UACH),  
121 Servicio Agrícola y Ganadero (Resolución ExentaN° 9244/2015). After capture, animals  
122 were kept in the dark in fabric bags for a maximum of two hours. Euthanasia was carried  
123 out in the field via intra-abdominal injection of sodium pentobarbital at a dosage of 100  
124 mg/kg of body weight. The Corporación Nacional Forestal, Ministerio de Agricultura,  
125 Gobierno de Chile allows to collect buccal swabs samples of *Eupsophus* species from wild  
126 protected areas (Permit No. 11/2016.-CPP/MDM/jcr/29.02.2016).

127

### 128 *Sample collection*

129 In total, 164 samples of *Eupsophus* from 45 localities in Chile were analysed (Fig 1,  
130 S1 Table). Each sampling site was geo-referenced with a GPS Garmin GPSmap 76CSx.  
131 Two individuals of *E. emiliopugini*, three *E. vertebralis*, and one *Alsodes valdiviensis* were  
132 used as outgroup (S1 Table, gray cells). Although mostly samples were obtained from  
133 buccal swabs according to Broquet et al. [43], some animals were euthanized. Liver tissue  
134 was extracted, conserved in 100% ethanol, and stored at -20°C. Specimens were deposited  
135 in herpetological collection from Instituto de Ciencias Marinas y Limnológicas,  
136 Universidad Austral de Chile (ICMLH). Voucher and isolate numbers were included in  
137 sequences information.

138

### 139 *DNA extraction, amplification, and sequence alignment*

140 Whole genomic DNA was extracted using Chelex following Walsh et al. [44]. We  
141 amplified via the polymerase chain reaction (PCR) three mitochondrial regions: a segment

142 of D-loop [45], Cytochrome *b* (Cyt *b*; [46]), and Cytochrome oxidase subunit I (COI; [47]),  
143 and two nuclear regions: POMC [48], and CRYBA1 [49]. We mixed reaction cocktails for  
144 PCR using 100 ng DNA, 10  $\mu$ mol of each oligonucleotide primer, 2X of Platinum® *Taq*  
145 DNA Polymerase master mix (Invitrogen, Cat. No. 10966), and nuclease-free water to final  
146 volume of 25  $\mu$ L. We verified successful PCR qualitatively by viewing bands of  
147 appropriate size following electrophoresis on 1.0% agarose gels. PCR products were  
148 sequenced in Macrogen Inc. (Seoul, Korea). Electropherograms were visualized and  
149 aligned with Geneious v.9.1.3 (GeneMatters Corp.) using the iterative method of global  
150 pairwise alignment (Muscle and ClustalW) implemented in the same software [50,51]. An  
151 inspection of aligned sequences by eye and manual corrections were also carried out. All  
152 sequences from *Eupsophus* and *Alsodes* were submitted to Genbank (XX000000-  
153 XX00000).

154

#### 155 *Phylogenetic analyses*

156 Phylogenetic trees were constructed with concatenated dataset using Maximum  
157 Likelihood (ML) and Bayesian inference (BI). Evolutionary models and partitioning  
158 strategies were evaluated with Partitionfinder v2.1.1 [52] and the best partition was  
159 identified using the Bayesian information criterion [53]. ML trees were inferred using  
160 GARLI v2.0 [54] with branch support estimated by nonparametric bootstrap (200  
161 replicates) [55]. Bayesian analyses were performed using MrBayes v3.2 [56]. Each Markov  
162 chain was started from a random tree and run for  $5.0 \times 10^7$  generations with every 1000th  
163 generation sampled from the chain. MCMC stationarity was checked as suggested in  
164 Nylander et al. [57]. All sample points prior to reaching the plateau phase were discarded as  
165 “burn-in”, and the remaining trees combined to find the a posteriori probability of  
166 phylogeny. Analyses were repeated four times to confirm that they all converged on the  
167 same results [58].

168 Species tree were reconstructed using the Singular Value Decomposition Scores for  
169 Species Quartets (SVDquartets) [62] and species tree reconstruction in BEAST v2.4.8  
170 (\*BEAST) [28,63].

171 SVDquartets method infers relationships among quartets of taxa under a coalescent  
172 model and then estimates the species tree using a quartet assembly method [59,60]. We  
173 evaluated all the possible quartets from the concatenated data set using SVDquartets  
174 module implemented in PAUP\* v4.0a [61]. Quartet’s Fiduccia and Mattheyses algorithm  
175 [62] and multispecies coalescent options were used to infer species tree from the quartets.  
176 We used nonparametric bootstrap with 100 replicates to assess the variability in the  
177 estimated tree [55].

178 For \*BEAST, multi-species coalescent module implemented in BEAST [28,63] and  
179 concatenated dataset were used. We set the partition scheme and models found by  
180 Partitionfinder. Mutation rates, clock models, and tree priors were the same detailed in  
181 divergence time estimates section (see below). MCMC were run three times for  $5.0 \times 10^7$   
182 generations each, logging tree parameters every 50,000 generations. Posterior distribution  
183 was summarized with Densitree v2.01 [63]. Chain mixing, convergence, and a posteriori  
184 probability were estimated in the same way of the Bayesian analyses described above.

185

#### 186 *Species delimitation analyses*

187 Two single-locus analyses, Bayesian General Mixed Yule Coalescent model  
188 (bGMYC; [25,64]) and multi-rate Poisson Tree Processes (mPTP; [65]) were performed on

189 mitochondrial dataset. The GMYC model distinguishes between intraspecific (coalescent  
190 process) and interspecific (Yule process) branching events on a phylogenetic tree [27]. We  
191 used the last 100 trees sampled from the posterior distribution of a Bayesian analysis for  
192 mitochondrial sequences (detailed in next section). Bayesian GMYC analyses were  
193 assessed using the R package bGMYC, where each tree was ran for 50,000 generations,  
194 discarding the first 40,000 generations as burn-in and using thinning intervals of 100  
195 generations (as recommended by Reid and Carstens [66]). The threshold parameter priors  
196 ( $t_1$  and  $t_2$ ) were set at 2 and 170, and the starting parameter value was set at 25.

197 mPTP is a phylogeny-aware approach that delimits species assuming a constant  
198 speciation rate with different intraspecific coalescent rates [65]. For this analysis, a tree  
199 obtained with mitochondrial dataset in MrBayes was used as input on the web server  
200 (<http://mptp.h-its.org/#/tree>).

201 Four multi-locus coalescent-based methods were applied to species delimitation:  
202 Tree Estimation using Maximum likelihood, (STEM; [16,19]), Bayesian Species  
203 Delimitation (BPP; [24,67]), Multi-locus Species Delimitation using a Trinomial  
204 Distribution Model (Tr2; [68]), and Bayes factor delimitation (BFD; [69]). As required by  
205 these software, a set of analyses assigning individuals to a series of species categories were  
206 performed (delimitation scenarios).

207 STEM analysis followed Harrington and Near [29]. ML scores for each species tree  
208 were generated with STEM v2.0 [19] and evaluated using information-theoretic approach  
209 outlined by [16].

210 BPP analysis was applied using Bayesian Phylogenetics and Phylogeography  
211 software (BPP v.2.2; [23,70]). We used A10 mode, which delimits species using a user-  
212 specified guide tree (species delimitation = 1, species tree = 0). Species tree obtained with  
213 \*BEAST was used as guide tree. Population size parameters ( $\theta_s$ ) and divergence time at the  
214 root of the species tree ( $\tau_0$ ) were estimated using A00 mode [67], while the other  
215 divergence time parameters were considered as the Dirichlet prior ([24]: equation 2). Each  
216 analysis was run four times to confirm consistency among runs. Following a conservative  
217 approach, only speciation events supported by probabilities larger or equal to 0.99 were  
218 considered for species delimitation.

219 Tr2 analysis followed Fujisawa et al. [68]. Gene trees were obtained in GARLI and  
220 its polytomies were resolved using internode branch lengths of  $1.0 \times 10^{-8}$  in Mesquite v2.75  
221 [71].

222 For BFD analysis, we reconstructed a species tree for each delimitation scenario  
223 using BEAST, as it was detailed in phylogenetic analyses section (see above). After the  
224 standard MCMC chain has finished, marginal likelihood estimation (MLE) was performed  
225 for each species tree, using both path sampling and stepping-stone via an additional run of  
226 ten million generations of 100 path-steps (1,000 million generations). Subsequently, Bayes  
227 factor between delimitation scenarios were calculated using MLEs [69] and evaluated using  
228 the framework of Kass and Raftery [72].

229 The taxonomic index of congruence ( $C_{tax}$ ) between pairs of species delimitation  
230 methods was estimated following Miralles and Vences' protocol [32]. In order to access  
231 most congruent species delimitation approaches, mean  $C_{tax}$  value for each method was also  
232 estimated.

233

234 *Divergence time estimates*



235 Divergence times were estimated with concatenated mitochondrial and nuclear  
236 dataset using the Bayesian method (BEAST v2.4.8; [63]). We used Neobatrachian mutation  
237 rates of 0.291037% and 0.374114% per million years for COI and POMC, respectively  
238 [73]. Mutation rates from the other markers were estimated using as prior nuclear or  
239 mitochondrial rates for all genes reported by Irrisarri et al. [73] (0.379173% and  
240 0.075283% respectively). Partitionfinder provided nucleotide substitution models.  
241 LogNormal relaxed clock model and birth-death process as tree prior were used. Bayes  
242 factor analysis [74] indicated that this setting received decisive support compared with  
243 other models and tree priors available in BEAST. Markov chains in BEAST were  
244 initialized from the tree obtained from species tree analyses to calculate posterior parameter  
245 distributions, including the tree topology and divergence times. We run this analyses for  
246  $5 \times 10^7$  generations, and sampling every 1000th generation. The first 10% of samples were  
247 discarded as “burn-in”, and we estimated convergence to the stationary distribution and  
248 acceptable mixing using Tracer v1.6 [75]. An additional BEAST analysis was carried out  
249 with only mitochondrial dataset using the same setting to obtain the last 100 trees. These  
250 trees were used as input in bGMYC (see section above).

251

## 252 **Results**

253

### 254 *Phylogenetic patterns in E. roseus group*

255 We aligned the five DNA markers for a total of 2576 sites, 858 were variable and  
256 700 were phylogenetically informative. Three of these markers corresponded to  
257 mitochondrial dataset with a total of 1799 nucleotide sites, 750 variable, and 629  
258 phylogenetically informative (see information for each marker in S2 Table). Evolutionary  
259 models and partitioning strategy obtained in Partitionfinder are also indicated in  
260 supplementary data (S2 Table).

261 The phylogenetic analysis using concatenated mitochondrial and nuclear sequences  
262 recovered three main well-supported clades corresponding to Clade A (including *E.*  
263 *insularis* and *E. migueli*), Clade B (*E. roseus*) and Clade C (*E. calcaratus*) (Fig 2).  
264 Although ML and Bayesian analyses recovered to B and C were sister clades, phylogenetic  
265 relationships among these clades received low support (Fig 2). Within these clades is  
266 possible recognize nine highly supported monophyletic lineages (Fig 2; Bootstrap >90,  
267 PP>0.9, lineages 1-9).

268

### 269 *Species delimitation analyses*

270 The most congruent result among single- and multi-locus analyses recognized nine  
271 monophyletic lineages as different species (Fig 3; mean *Ctax*= 0.69, see all *Ctax* values in  
272 S3 table). These nine lineages were the same recovered in the phylogenetic analyses and  
273 were also supported in the consensus tree from the SVDquartets analysis (Fig 3; Bootstrap  
274 >70). Having in mind, geographical distribution (Fig 1) and phylogenetic analyses of Blotto  
275 et al [34], these lineages corresponded to the formerly eight *Eupsophus* species of the  
276 *roseus* group: *E. altor*, *E. migueli*, *E. insularis*, *E. contulmoensis*, *E. nahuelbutensis*, *E.*  
277 *septentrionalis*, *E. roseus*, *E calcaratus*, plus a lineage composed by specimens from  
278 Villarrica locality, hereafter referred to as *Eupsophus* sp. (Fig 3).

279

280 Bayesian GMYC analyses detected more than one species in these nine lineages  
281 except in *E. insularis* and *E. contulmoensis* (Fig 3). Multi rate PTP detected six species  
281 corresponding to *E. altor*, *E. migueli*, *E. insularis*, *E. contulmoensis*, *E. nahuelbutensis*, *E.*

282 *septentrionalis* lineages, and more than one species in *E. roseus* and *E. calcaratus* lineages  
283 (Fig 3). Nine-species scenario (Fig 4A, gray cell) was the highest supported in BPP and Tr2  
284 analyses (Fig 4B, black arrows, scenario 12). For STEM analysis the eight-species scenario,  
285 where *Eupsophus* sp. and *E. roseus* represent a single species, was the highest supported  
286 (Fig 4A, scenario 11). Nevertheless, among the other species delimitation scenarios, the  
287 STEM analysis greatly favored a nine-species delimitation scenario (Fig 4B, S4 Table).  
288 Highest MLEs in BFD analysis were obtained for eight-species scenario, where *E. altor*  
289 and *E. migueli* corresponded to one species (Fig 4, scenario 10). In this case, Bayes factor  
290 comparisons were greater than two, which allowed us to choose that better scenario (S5  
291 Table). Nevertheless, comparisons with some scenarios including that of nine-species were  
292 around four, which indicate non-strong or decisive support to the best model (S5 Table).  
293 Other possible scenarios, including that proposed by Correa et al. [35] (scenario 3), were  
294 lowly supported for all multi-locus analyses (Fig 4).

295

### 296 *Species tree and divergence times estimates among Eupsophus species*

297 Species tree reconstructions in \*BEAST and SVDquartets, using the nine lineages  
298 (=species), recovered similar phylogenetic relationships to the Bayesian and ML analyses  
299 (Fig 5). Under this scenario, *E. calcaratus* diverged early in *Eupsophus* radiation for both  
300 species tree and divergence time tree. This topology appeared to be supported as it is  
301 revealed by overlaying posterior sets of trees generated by BEAST and plotted by  
302 DensiTree (Fig 5). Thus, we decided to use consensus species tree as a prior to estimate  
303 divergence times among *Eupsophus* species (Fig. 5, in blue).

304 The age of crown-group *Eupsophus* and the origin of *E. calcaratus* are estimated at  
305 0.396 (0.351–0.442) Myr. *Eupsophus insularis* diverged at 0.268 (0.230–0.308) Myr, while  
306 *E. altor* and *E. migueli* at 0.096 (0.077–0.116) Myr (Fig 5). The split between *E. roseus* and  
307 *Eupsophus* sp. / *E. contulmoensis*, *E. nahuelbutensis*, and *E. septentrionalis* was around  
308 0.134 (0.114–0.154) Myr. The divergence between *E. roseus* and *Eupsophus* sp. is  
309 estimated at 0.088 (0.072–0.106) Myr. *Eupsophus septentrionalis* diverged at 0.111  
310 (0.193–0.131) Myr, followed of *E. contulmoensis* and *E. nahuelbutensis* at 0.054 (0.041–  
311 0.067) Myr (Fig 5).

312

## 313 **Discussion**

314

### 315 *Species delimitation in the Eupsophus roseus group*

316 The most congruent species delimitation results detected nine species in the *E.*  
317 *roseus* group, eight of them (namely *E. altor*, *E. calcaratus*, *E. contulmoensis*, *E. insularis*,  
318 *E. migueli*, *E. nahuelbutensis*, *E. roseus*, and *E. septentrionalis*), concordant with  
319 taxonomic proposals of the last decades [34,36,76–81].

320 The highest level of congruence was obtained with BPP and Tr2 methods (mean  
321  $C_{tax}$ =0.69; nine species), followed by STEM, and BFD (mean  $C_{tax}$ =0.63; eight species;  
322 Figs 3 and 4, S3 Table). Although, *Eupsophus* sp. and *E. roseus* clades were recovered as a  
323 single species by STEM, these clades were recovered as different species by BPP, Tr2,  
324 mPTP and BFD analyses. Similarly with *E. migueli* and *E. altor*, which were recovered as a  
325 single species by BFD but as two different species in the other analyses. Therefore, the  
326 greatest congruence indicate Clade B is composed by five different species (*Eupsophus* sp.,  
327 *E. roseus*, *E. nahuelbutensis*, *E. contulmoensis* and *E. septentrionalis*), while Clade A by  
328 three (*E. altor*, *E. migueli*, and *E. insularis*) as it is suggested in previous works [78,82].

329 The differences among results of these species delimitation methods could be derived from  
330 its different sensibility to the ratio of population size to divergence time, such as it has been  
331 reported between BPP and bPTP [15]. Hence the importance of carrying out several species  
332 delimitation methods to examine whether the proposed groups are consistently recovered  
333 with different algorithms [15,11]. This is evident when we compared results from multi-  
334 locus analyses with bGMYC result (mean Ctax=0.27), which overestimated the species  
335 number in all lineages except in *E. insularis* and *E. contulmoensis* (Fig 3). It is known that  
336 bGMYC has shortcomings when datasets consist of few putative species [83] and cannot be  
337 used as sufficient evidence for evaluating the specific status without additional data or  
338 analyses [84]. Moreover, this method tends to overestimate the number of species when the  
339 ancestral polymorphism is low [85]. Therefore, rather than use this method as a species  
340 delimitation approach, we used it to obtain alternative scenarios to be tested with multi-  
341 locus analyses (e.g. scenario 13, Fig 4).

342 Our delimitation results were not agreed with a recent hypothesis [35], which would  
343 be related to use of different molecular markers and species delimitation analyses. Three of  
344 our markers were found to be highly variables (Cyt *b*, COI, D-loop), while two were  
345 conserved (POMC and CRYBA1; see S2 table). Thus we use at least three strong markers  
346 (sequences with many polymorphic sites), a key aspect to carried out coalescent analyses  
347 when less than ten markers are used [86]. On the other hand, we used several multi-locus  
348 coalescent methods to delimitate species (BPP, STEM, R2, and BFD), while Correa et al.  
349 [35] based its inferences in single-locus analyses (GMYC, mPTP, and Automatic Barcode  
350 Gap Discovery, ABGD). In this sense, mPTP (using mitochondrial data set) and ABGD  
351 (using mitochondrial + nuclear data set) recovered to the two groups of sinonimized species  
352 as two species [35]. ABGD method is based on genetic distances computed from a single-  
353 locus (COI) and requires a priori specification of an intraspecific distance threshold [87].  
354 The robustness and accuracy of coalescent approaches over distance methods is well know,  
355 partly because the last do not appeal to an explicit species concept [15,88]. Therefore, we  
356 decided not to include ABGD in our main species delimitation analyses. Nevertheless, we  
357 conducted ABGD analyses using our COI data set, and our concatenated data set, obtaining  
358 different results (see S1 File). On this regard, using two potential barcode gaps, we detected  
359 nine and five groups with COI, while six and four groups were obtained with concatenated  
360 dataset. Consequently, ABGD results can be influenced by the application of a method  
361 designed for single-locus (DNA barcoding) to concatenated dataset, as well as by the a  
362 priori election of distance threshold. Moreover, ABGD analysis underestimated species  
363 diversity among species with low divergence [87,89]. Thus, ABGD tool is recommended as  
364 a first grouping hypothesis but not as robust and definitive species delimitation proof [87].  
365

### 366 *Phylogenetic relationships and divergence time in the Eupsophus roseus group*

367 Monophyly of *E. roseus* group and its nine delimited species was strongly  
368 supported, concordant with previous analyses (Fig 2; [34,82]. Although the early  
369 divergence of *E. calcaratus* was not strongly supported in Bayesian, ML, and SVDquartet  
370 approaches, our analyses resolved all other interspecific relationships among delimited  
371 species (Figs 2 and 3). In fact, the plot of overlying posterior sets of species trees (Fig 5)  
372 showed few alternative interspecific relationships. One example of this, is the early  
373 divergence of *E. septentrionalis* within Clade B, which was also recovered by Blotto et al  
374 [34] and Suárez-Vilota et al [81] (Fig 5, in red).



375 Phylogenetic and species delimitation analyses recognized to *Eupsophus* sp. as a  
376 distinct species (Figs 3 and 4). In fact, SVDquartet analysis detected this clade with greater  
377 support than other well-defined species such as *E. insularis* (Fig 3; bootstrap: 95%), and  
378 high probabilities were detected in single- and multi-locus species delimitation analyses  
379 (Fig 3 and 4). These results are concordant with previous works where suggested a species-  
380 level for this lineage [82]. Although Correa et al. [35] also detected a close phylogenetic  
381 relationship between Villarrica and *E. roseus* specimens, they considered the three  
382 specimens from this locality within the *E. roseus* diversity. We sampled 17 specimens from  
383 this locality and they were monophyletic with high support (Fig 2; Bootstrap: 100, PP: 1.0).  
384 Additionally, we did not detect syntopy instances in Villarrica, which could result in to  
385 recover specimens from other localities within Villarrica clade (i.e. interpopulational  
386 paraphyly). This paraphyletic pattern is common for localities within *E. roseus* lineage, an  
387 additional support to consider that Villarrica specimens do not belong to *E. roseus* species.  
388 For example, specimens from Fundo Santa María (FS) are recovered with specimens from  
389 other localities [e.g. Mafil (MA), Llancahue (LA)], in several highly supported clades  
390 within *E. roseus* lineage (Fig 2).

391 Mostly of delimited species from *E. roseus* group diverged from 0.134 to 0.054  
392 Mya during Valdivian interglacial [90], except *E. calcaratus* and *E. insularis*, whose origin  
393 is older (before of the last southern Patagonian glaciation, 0.18 Mya). The oldest deposits  
394 of Mocha Island are dated from the Eocene and Miocene [91] whereas extensive terraces  
395 from Pliocene and Pleistocene characterize more recent settings [92]. Although the origin  
396 and presence of *E. insularis* in the Mocha Island remains unknown, these large terraces  
397 might have been a suitable habitat for its settlement and for its differentiation from the  
398 continental *Eupsophus* species. Anyway, it is possible that all species lived during Valdivia  
399 interglacial and subsequently were affected by the Last Glacial Maximum (LGM, 0.020-  
400 0.014 Mya; [93,94]). Valdivia interglacial was characterized by the presence of North  
401 Patagonian forests and Valdivian rainforests [95], which are habitats associated to  
402 *Eupsophus* species [82]. These suitable Late Pleistocene habitats for *Eupsophus* species  
403 probably were contracted during periods of glacial advance, whereas distributional range  
404 shifted during glacial retreats and warming. Therefore, it is possible hypothesize a wide  
405 distribution of *Eupsophus* species during the interglacial, followed by restricted distribution  
406 in refugia during the LMG. These cycling events has been hypothesized in other terrestrial  
407 vertebrate species [96–98]. Thus, the effect of late Pleistocene cycling events could be  
408 related with the actual restricted distribution of some *Eupsophus* species (e. g. *E. migueli*,  
409 *E. altor*, *E. contulmoensis*, *E. nahuelbutensis*; *Eupsophus* sp. *E. septentrionalis*).

410 Finally, the lineage represented by Villarrica specimens (*Eupsophus* sp.) diverged  
411 from *E. roseus* at ~ 0.088 Mya (Fig 5). Under this temporal scenario it is possible that this  
412 lineage lived during interglacial and subsequently was affected by LGM. A central east  
413 colonization of an ancestral *E. roseus* population could have given rise to *Eupsophus* sp.  
414 during warmer interglacial conditions. In this sense, this putative species probably  
415 represents a remnant lineage left behind in central-west Chilean refugia present during  
416 LGM. In short, isolation during LGM, the monophyly, and coalescent species delimitation  
417 suggest taxonomic differentiation of Villarrica specimens.

418 Using new molecular datasets and coalescent analyses, our approach revitalizes in  
419 an independent way, the hypothesis that *E. roseus* group is composed by eight species.  
420 Moreover, we suggest the taxonomic differentiation for Villarrica specimens. We suggest

421 filling bioacoustic, morphological, behavioral, and karyotypic data gaps to a deep  
422 *Eupsophus* revision.

423

#### 424 **Acknowledgements**

425 We thank to Engr. Nicolás González for field assistance. The Corporación Nacional  
426 Forestal, Ministerio de Agricultura, Gobierno de Chile allows to collect buccal swabs  
427 samples of *Eupsophus* species from wild protected areas (Permit No. 11/2016.-CPP/  
428 MDM/jcr/29.02.2016). Fondecyt 3160328 to EYS-V supported this research.

429

#### 430 **References**

431

- 432 1. Sites JW, Marshall JC. Delimiting species: a Renaissance issue in systematic  
433 biology. *Trends Ecol Evol.* 2003;18: 462–470.
- 434 2. Fujita MK, Leache AD, Burbrink FT, McGuire JA, Moritz C. Coalescent-based  
435 species delimitation in an integrative taxonomy. *Trends Ecol Evol.* 2012;27: 480–  
436 488.
- 437 3. Flot JF. Species delimitation’s coming of age. *Syst Biol.* 2015;64: 897–899.
- 438 4. De Queiroz K. Species concepts and species delimitation. *Syst Biol.* 2007;56: 879–  
439 886.
- 440 5. Agapow PM, Bininda-Emonds ORP, Crandall KA, Gittleman JL, Mace GM,  
441 Marshall JC, et al. The impact of species concept on biodiversity studies. *Q Rev*  
442 *Biol.* 2004;79: 161–179.
- 443 6. Tulloch AIT, Auerbach N, Avery-Gomm S, Bayraktarov E, Butt N, Dickman CR, et  
444 al. A decision tree for assessing the risks and benefits of publishing biodiversity data.  
445 *Nat Ecol Evol.* 2018;2: 1209–1217.
- 446 7. Wheeler Q, Meier R. Species concepts and phylogenetic theory: a debate. Columbia  
447 Univ Press. 2000.
- 448 8. Stamos DN. The species problem: biological species, ontology, and the metaphysics  
449 of biology. Lexington Books. 2003.
- 450 9. Hart MW. The species concept as an emergent property of population biology.  
451 *Evolution.* 2010;65: 613–616.
- 452 10. Gratton P, Trucchi E, Trasatti A, Riccarducci G, Marta S, Allegrucci G, et al.  
453 Testing classical species properties with contemporary data: how “bad species” in  
454 the Brassy Ringlets (*Erebia tyndarus* complex, Lepidoptera) turned good. *Syst Biol.*  
455 2016;65: 292–303.
- 456 11. Carstens BC, Pelletier TA, Reid NM, Satler JD. How to fail at species delimitation.  
457 *Mol Ecol.* 2013;22: 4369–4383.
- 458 12. Shaffer HB, Thomson RC. Delimiting species in recent radiations. *Syst Biol.*  
459 2007;56: 896–906.
- 460 13. Knowles LL&, Carstens BC. Delimiting species without monophyletic gene trees.  
461 *Syst Biol.* 2007;56: 887–895.
- 462 14. Wiens JJ. Species delimitation: new approaches for discovering diversity. *Syst Biol.*  
463 2007;56: 875–878.
- 464 15. Luo A, Ling C, Ho SYW, Zhu CD. Comparison of methods for molecular species  
465 delimitation across a range of speciation scenarios. *Syst Biol.* 2018;0: 1–13.
- 466 16. Carstens BC, Dewey TA. Species delimitation using a combined coalescent and  
467 information-theoretic approach: an example from north american *myotis* bats. *Syst*

- 468 Biol. 2010;59: 400–414.
- 469 17. Maddison WP, Knowles LL. Inferring phylogeny despite incomplete lineage sorting.  
470 Syst Biol. 2006;55: 21–30.
- 471 18. Liu L, Pearl DK, Brumfield RT, Edwards S V, Knowles L. Estimating species trees  
472 using multiple-allele DNA sequence data. Evolution. 2008;62: 2080–2091.
- 473 19. Kubatko LS, Carstens BC, Knowles LL. STEM: species tree estimation using  
474 maximum likelihood for gene trees under coalescence. Bioinformatics. 2009;25:  
475 971–973.
- 476 20. Kingman J. One genealogy of large populations. J Appl Probab. 1982;19: 27–43.
- 477 21. Tajima F. Evolutionary relationship of DNA sequences in finite populations.  
478 Genetics. 1983;105: 437–460.
- 479 22. Takahata N, Satta Y, Klein J. Divergence time and population size in the lineage  
480 leading to modern humans. Theor Popul Biol. 1995;48: 198–221.
- 481 23. Rannala B, Yang Z. Bayes estimation of species divergence times and ancestral  
482 population sizes using DNA sequences from multiple loci. Genetics. 2003;164:  
483 1645–1656.
- 484 24. Yang Z, Rannala B. Bayesian species delimitation using multilocus sequence data.  
485 2010;107: 1–6.
- 486 25. Fujisawa T, Barraclough TG. Delimiting species using single-locus data and the  
487 Generalized Mixed Yule Coalescent approach: a revised method and evaluation on  
488 simulated data sets. Syst Biol. 2013;62: 707–724.
- 489 26. O’Meara BC. New heuristic methods for joint species delimitation and species tree  
490 inference. Syst Biol. 2010;59: 59–73.
- 491 27. Pons J, Barraclough TG, Gomez-Zurita J, Cardoso A, Duran DP. Sequence-based  
492 species delimitation for the DNA taxonomy of undescribed insects. Syst Biol.  
493 2006;55: 595–609.
- 494 28. Heled J, Drummond AJ. Bayesian inference of species trees from multilocus data.  
495 Mol Biol Evol. 2010;27: 570–580.
- 496 29. Harrington RC, Near TJ. Phylogenetic and coalescent strategies of species  
497 delimitation in snubnose darters (Percidae: *Etheostoma*). Syst Biol. 2012;61: 63–69.
- 498 30. Schlick-Steiner BC, Steiner FM, Seifert B, Stauffer C, Christian E, Crozier RH.  
499 Integrative taxonomy: a multisource approach to exploring biodiversity. Annu Rev  
500 Entomol. 2010;55: 421–438.
- 501 31. Edwards DL, Knowles LL. Species detection and individual assignment in species  
502 delimitation: can integrative data increase efficacy? Proc R Soc B. 2014;281:  
503 20132765.
- 504 32. Miralles A, Vences M. New metrics for comparison of taxonomies reveal striking  
505 discrepancies among species delimitation methods in *Madascincus* lizards. PLoS  
506 One. 2013;8: e68242. doi:10.1371/journal.pone.0068242.
- 507 33. Frost DR. 2018. Amphibian Species of the World: an Online Reference; 2018 (cited  
508 2018 Ago 30). Available from:  
509 <http://research.amnh.org/herpetology/amphibia/index.html>
- 510 34. Blotto BL, Nuñez JJ, Basso NG, Úbeda CA, Wheeler WC, Faivovich J. Phylogenetic  
511 relationships of a Patagonian frog radiation, the *Alsodes+Eupsophus* clade (Anura:  
512 Alsodidae), with comments on the supposed paraphyly of *Eupsophus*. Cladistics.  
513 2013;29: 113–131.
- 514 35. Correa C, Vásquez D, Castro-Carrasco C, Zúñiga-Reinoso Á, Ortiz JC, Palma RE.

- 515 Species delimitation in frogs from South American temperate forests: the case of  
516 *Eupsophus*, a taxonomically complex genus with high phenotypic variation. PLoS  
517 One. 2017;12: e0181026. doi:10.1371/journal.pone.0181026.
- 518 36. Formas JR. A new species of leptodactylid frog (*Eupsophus*) from the coastal range  
519 in southern Chile. Stud Neotrop Fauna Environ. 1978;13: 1–9.
- 520 37. Pyron RA, Wiens JJ. A large-scale phylogeny of Amphibia including over 2800  
521 species, and a revised classification of extant frogs, salamanders, and caecilians. Mol  
522 Phylogenet Evol. 2011;61: 543–583.
- 523 38. Veloso A, Celis-Diez LJ, Guerrero CP, Méndez AM, Iturra P, Simonetti AJ.  
524 Description of a new *Eupsophus* species (Amphibia, Leptodactylidae) from the  
525 remnants of Maulino Forest central Chile. Herpetol J. 2005;15: 159–165.
- 526 39. Correa C, Veloso A, Iturra P, Mendez AM. Phylogenetic relationships of Chilean  
527 leptodactylids: a molecular approach based on mitochondrial genes 12S and 16S.  
528 Rev Chil Hist Nat. 2006;79: 435–450.
- 529 40. Formas JR, Nuñez JJ, Cuevas C. Identidad de la rana austral chilena *Eupsophus*  
530 *coppigeri* (Amphibia, Anura, Neobatrachia): evidencias morfológicas, cromosómicas  
531 y moleculares. Rev Chil Hist Nat. 2008;81: 3–20.
- 532 41. Formas JR, Lacrampe S, Brieva L. Allozymic and morphological differentiation  
533 among three South American frogs, genus *Eupsophus*. Biochem Mol Biol. 1992;102:  
534 57–60.
- 535 42. Nuñez JJ. Taxonomía y sistemática de las ranas del género *Eupsophus*  
536 (Leptodactylidae). Tesis Doctoral, Univ Austral Chile Valdivia. 2003. Available  
537 from: <http://cybertesis.uach.cl/>
- 538 43. Broquet T, Berset-Braendli L, Emaresi G, Fumagalli L. Buccal swabs allow efficient  
539 and reliable microsatellite genotyping in amphibians. Conserv Genet. 2007;8: 509–  
540 511.
- 541 44. Walsh PS, Metzger DA, Higuchi R. Chelex 100 as a medium for simple extraction of  
542 DNA for PCR-based typing from forensic material. Biotechniques. 1991;10: 506–  
543 513.
- 544 45. Goebel AM, Donnelly JM, Atz ME. PCR primers and amplification methods for 12S  
545 ribosomal DNA, the control region, cytochrome oxidase I, and cytochrome *b* in  
546 bufonids and other frogs, and an overview of PCR primers which have amplified  
547 DNA in amphibians successfully. Mol Phylogenet Evol. 1999;11: 163–199.
- 548 46. Degnan SM, Moritz C. Phylogeography of mitochondrial DNA in two species of  
549 white-eye in Australia. Auk. 1992;109: 800–811.
- 550 47. Folmer O, Black M, Hoeh W, Lutz R, Vrijenhoek R. DNA primers for amplification  
551 of mitochondrial cytochrome oxidase subunit I from diverse metazoan invertebrates.  
552 Mol Mar Biol Biotechnol. 1994;3: 294–299.
- 553 48. Gamble T, Bauer AM, Greenbaum E, Jackman TR. Out of the blue: a novel, trans-  
554 Atlantic clade of geckos (Gekkota, Squamata). Zool Scr. 2008;37: 355–366.
- 555 49. Dolman G, Phillips B. Single copy nuclear DNA markers characterized for  
556 comparative phylogeography in Australian wet tropics rainforest skinks. Mol Ecol  
557 Notes. 2004;4: 185–187.
- 558 50. Edgar RC, Drive RM, Valley M. MUSCLE : multiple sequence alignment with high  
559 accuracy and high throughput. Nucleic Acids Res. 2004;32: 1792–1797.
- 560 51. Thompson JD, Higgins DG, Gibson TJ. CLUSTAL W: improving the sensitivity of  
561 progressive multiple sequence alignment through sequence weighting, position-



- 562 specific gap penalties and weight matrix choice. *Nucleic Acids Res.* 1994;22: 4673–  
563 4680.
- 564 52. Lanfear R, Frandsen PB, Wright AM, Senfeld T, Calcott B. Partitionfinder 2: new  
565 methods for selecting partitioned models of evolution for molecular and  
566 morphological phylogenetic analyses. *Mol Biol Evol.* 2017;34: 772–773.
- 567 53. Schwarz G. Estimating the dimension of a model. *Ann Stat.* 1978;6: 461–464.
- 568 54. Bazinet AL, Zwickl DJ, Cummings MP. A gateway for phylogenetic analysis  
569 powered by grid computing featuring GARLI 2.0. *Syst Biol.* 2014;63: 812–818.
- 570 55. Felsenstein J. Confidence limits on phylogenies: an approach using the bootstrap.  
571 *Evolution.* 1985;39: 783–791.
- 572 56. Ronquist F, Teslenko M, Van der Mark P, Ayres D, Darling A, Hohna S, et al.  
573 MrBayes 3.2: Efficient Bayesian phylogenetic inference and model choice across a  
574 large model space. *Syst Biol.* 2011;61: 539–542.
- 575 57. Nylander JA, Ronquist F, Huelsenbeck JP, Nieves-Aldrey JL. Bayesian phylogenetic  
576 analysis of combined data. *Syst Biol.* 2004;53: 47–67.
- 577 58. Huelsenbeck J, Rannala P. Frequentist properties of Bayesian posterior probabilities  
578 of phylogenetic trees under simple and complex substitution models. *Syst Biol.*  
579 2004;53: 904–913.
- 580 59. Chifman J, Kubatko L. Quartet inference from SNP data under the coalescent model.  
581 *Bioinformatics.* 2014;30: 3317–3324.
- 582 60. Chifman J, Kubatko L. Identifiability of the unrooted species tree topology under the  
583 coalescent model with time-reversible substitution processes, site-specific rate  
584 variation, and invariable sites. *J Theor Biol.* 2015;374: 35–47.
- 585 61. Swofford D. PAUP\*. Phylogenetic analysis using parsimony (\*and other methods).  
586 Version 4. Sinauer Associates, Sunderland, Massachusetts. 2003.
- 587 62. Reaz R, Bayzid MS, Rahman MS. Accurate phylogenetic tree reconstruction from  
588 quartets: a heuristic approach. *PLoS One.* 2014;9: e104008.  
589 doi:10.1371/journal.pone.0104008
- 590 63. Bouckaert R, Heled J, Kühnert D, Vaughan T, Wu CH, Xie D, et al. BEAST 2: A  
591 software platform for bayesian evolutionary analysis. *PLoS Comput Biol.* 2014;10:  
592 e1003537. doi:10.1371/journal.pcbi.1003537.
- 593 64. Pons J, Barraclough TG, Gomez-Zurita J, Cardoso A, Duran DP, Hazell S, et al.  
594 Sequence-based species delimitation for the DNA taxonomy of undescribed insects.  
595 *Syst Biol.* 2006;55: 595–609.
- 596 65. Kapli P, Lutteropp S, Zhang J, Kobert K, Pavlidis P, Stamatakis A, et al. Multi-rate  
597 Poisson tree processes for single-locus species delimitation under maximum  
598 likelihood and Markov chain Monte Carlo. *Bioinformatics.* 2017;33: 1630–1638.
- 599 66. Reid NM, Carstens BC. Phylogenetic estimation error can decrease the accuracy of  
600 species delimitation: a Bayesian implementation of the general mixed Yule-  
601 coalescent model. *BMC Evol Biol.* 2012;12: 2397–2416.
- 602 67. Yang Z. The BPP program for species tree estimation and species delimitation. *Curr*  
603 *Zool.* 2015;61: 854–865.
- 604 68. Fujisawa T, Aswad A, Barraclough TG. A rapid and scalable method for multilocus  
605 species delimitation using Bayesian model comparison and rooted triplets. *Syst Biol.*  
606 2016;65: 759–771.
- 607 69. Grummer JA, Bryson RW, Reeder TW. Species delimitation using Bayes factors:  
608 simulations and application to the *Sceloporus scalaris* species group (Squamata:

- 609 Phrynosomatidae). *Syst Biol.* 2014;63: 119–133.
- 610 70. Yang Z, Rannala B. Bayesian species delimitation using multilocus sequence data.  
611 2010;107: 9264–9269.
- 612 71. Maddison WP, Maddison DR. Mesquite: a modular system for evolutionary analysis.  
613 Version 2.75. 2011. Available from. <https://www.mesquiteproject.org/>
- 614 72. Kass RE, Raftery AE. Bayes factors. *J Am Stat Assoc.* 1995;90: 773–795.
- 615 73. Irisarri I, Mauro DS, Abascal F, Ohler A, Vences M, Zardoya R. The origin of  
616 modern frogs (Neobatrachia) was accompanied by acceleration in mitochondrial and  
617 nuclear substitution rates. *BMC Genomics.* 2012;13: 626. doi:10.1186/1471-2164-  
618 13-626
- 619 74. Li WLS, Drummond AJ. Model averaging and Bayes factor calculation of relaxed  
620 molecular clocks in Bayesian phylogenetics. *Mol Biol Evol.* 2012;29: 751–761.
- 621 75. Rambaut A, Drummond AJ. Tracer v1.6. 2009. Available from  
622 <http://beast.bio.ed.ac.uk/tracer>.
- 623 76. Ibarra-Vidal H, Ortiz JC, Torres-Pérez F. *Eupsophus septentrionalis*, nueva especie  
624 de Leptodactylidae (Amphibia) de Chile central. *Bol Soc Biol Concepción.* 2004;75:  
625 91–112.
- 626 77. Nuñez JJ, Zarraga AM, Formas RJ. New molecular and morphometric evidence for  
627 the validation of *Eupsophus calcaratus* and *E. roseus* (Anura: Leptodactylidae) in  
628 Chile. *Stud Neotrop Fauna Environ.* 1999;34: 150–155.
- 629 78. Nunez JJ, Rabanal FE, Formas JR. Description of a new species of *Eupsophus*  
630 (Amphibia: Neobatrachia) from the Valdivian Coastal range, Southern Chile: an  
631 integrative taxonomic approach. *Zootaxa.* 2012;3305: 53–68.
- 632 79. Ortiz JC, Ibarra-Vidal H. Una nueva especie de Leptodactylidae (*Eupsophus*) de la  
633 Cordillera de Nahuelbuta (Chile). *Acta Zoológica Lilloana.* 1992;41: 75–79.
- 634 80. Ortiz JC, Ibarra-Vidal H, Formas JR. A new species of *Eupsophus* (Anura:  
635 Leptodactylidae) from Contulmo, Nahuelbuta range, southern Chile. *Proc Biol Soc*  
636 *Washingt.* 1989;102: 1031–1035.
- 637 81. Suárez-Villota E, Quercia CA, Nuñez JJ. Mitochondrial genomes of the Patagonian  
638 frogs *Eupsophus vertebralis* and *E. emiliopugini* (Amphibia: Alsodidae). *J*  
639 *Genomics.* 2018;6: 98-102.
- 640 82. Nunez JJ, Wood NK, Rabanal FE, Fontanella FM, Sites Jr. JW. Amphibian  
641 phylogeography in the Antipodes: refugia and postglacial colonization explain  
642 mitochondrial haplotype distribution in the Patagonian frog *Eupsophus calcaratus*  
643 (Cycloramphidae). *Mol Phylogenet Evol.* 2011;58: 343–352.
- 644 83. Talavera G, Dincă V, Vila R. Factors affecting species delimitations with the GMYC  
645 model: Insights from a butterfly survey. *Methods Ecol Evol.* 2013;4: 1101–1110.
- 646 84. Dellicour S, Flot J-F. Delimiting species-poor datasets using single molecular  
647 markers: a study of barcode gaps, haplowebs and GMYC. *Syst Biol.* 2015;4 1–30.
- 648 85. Esselstyn JA, Evans B J, Sedlock JL, Anwarali Khan FA, Heaney LR. Single-locus  
649 species delimitation: a test of the mixed Yule-coalescent model, with an empirical  
650 application to Philippine round-leaf bats. *R Soc.* 2012;0705: 1–9.
- 651 86. Xu B, Yang Z. Challenges in species tree estimation under the multispecies  
652 coalescent model. *Genetics.* 2016;204: 1353-1368.
- 653 87. Puillandre N, Lambert A, Brouillet S, Achaz G. ABGD, Automatic Barcode Gap  
654 Discovery for primary species delimitation. *Mol Ecol.* 2012;21: 1864–1877.
- 655 88. Waugh J. DNA barcoding in animal species: progress, potential and pitfalls.

- 656 BioEssays. 2007;29: 188–197.
- 657 89. Yu G, Rao D, Matsui M, Yang J. Coalescent-based delimitation outperforms  
658 distance-based methods for delineating less divergent species: the case of *Kurixalus*  
659 *odontotarsus* species group. *Sci Rep*. 2017;7: 1–13.
- 660 90. Latorre C, Moreno P, Vargas G, Maldonado A, Villa-Martínez R, Armesto J, et al.  
661 Late Quaternary environments and Palaeo-Climates In: Moreno T. & Gibbons W. *The*  
662 *Geology of Chile*. The Geological Society, London. 2007.
- 663 91. Tavera J, Veyl C, Cristi J. Reconocimiento geológico de la Isla Mocha. *An Fac Cs*  
664 *Fis Mat Univ de Chile*. 1958;12: 157–188.
- 665 92. Melnick D, Sanchez M, Echtler H, Bataille K, Pineda V. Geología estructural de la  
666 Isla Mocha centro-sur de Chile (38°S, 74°W): implicancias en la tectónica regional.  
667 10 Congr Geológico Chil Univ Concepción, Concepción, Chile. 2003.
- 668 93. Clark PU, Dyke AS, Shakun JD, Carlson AE, Clark J, Wohlfarth B, et al. The Last  
669 Glacial Maximum. *Science*. 2009;325: 710–714.
- 670 94. Mercer JH. Chilean glacial chronology 20,000 to 11,000 carbon 14 years ago: some  
671 global comparisons. *Science*. 1972;176: 1118–1120.
- 672 95. Astorga G, Pino M. Fossil leaves from the last interglacial in central-Southern Chile:  
673 inferences regarding the vegetation and paleoclimate. *Geol Acta*. 2011;9: 45–54.
- 674 96. Gallardo MH, Suárez-Villota EY, Nuñez JJ, Vargas RA, Haro R, Köhler N.  
675 Phylogenetic analysis and phylogeography of the tetraploid rodent *Tympanoctomys*  
676 *barrerae* (Octodontidae): insights on its origin and the impact of Quaternary climate  
677 changes on population dynamics. *Biol J Linn Soc*. 2013;108: 453–469.
- 678 97. Sérsic AN, Cosacov A, Cocucci AA, Johnson LA, Pozner R, Avila LJ, et al.  
679 Emerging phylogeographical patterns of plants and terrestrial vertebrates from  
680 Patagonia. *Biol J Linn Soc*. 2011;103: 475–494.
- 681 98. Victoriano PF, Ortiz JC, Benavides E, Adams BJ, Sites Jr. JW. Comparative  
682 phylogeography of codistributed species of Chilean *Liolaemus* (Squamata:  
683 Tropicuridae) from the central-southern Andean range. *Mol Ecol*. 2008;17: 2397–  
684 2416.

685

## 686 **Figure captions**

687

688 **Fig 1. Map depicting 45 localities of *Eupsophus* samples from Chile (listed in S1**  
689 **Table).** *E. roseus*: localities 1- 16 (red), *E. insularis*: locality 17 (purple), *E. migueli*:  
690 localities 18 -20 (blue), *E. calcaratus*: localities 21-43 (yellow). Localities of outgroup  
691 were: *E. emiliopugini*: 44 and 45 (white), *E. vertebralis*: 12, 19, 22, *Alsodes norae*: 19.

692

693 **Fig 2. Phylogenetic relationships among *Eupsophus* species.** This maximum likelihood  
694 (ML) tree was reconstructed using concatenated nuclear and mitochondrial data set.  
695 Topologies obtained by ML and Bayesian inference were similar. Numbers above branches  
696 represent bootstrap scores and Bayesian posterior probabilities. Isolate numbers consist by  
697 the species abbreviation (*E. roseus*: ER, *E. migueli*: EM, *E. insularis*: EI, and *E. calcaratus*:  
698 EC), locality abbreviation listed in S1 Table, and field number. Major clades (A, B, and C)  
699 and lineages (1-9) of *Eupsophus* are indicated.

700

701 **Fig 3. SVDquartets and species delimitation analyses.** Majority-rule consensus tree from  
702 the SVDquartets analysis. Nodal support values are bootstrap proportions. Bars on the right

703 of the tree indicate the species limits as proposed by bGMYC, mPTP, STEM, BPP, Tr2 and  
704 BFD analyses. All analyses were carried out with mitochondrial and nuclear loci, except  
705 bGMYC and mPTP which used only mitochondrial data set. Limits of formerly *Eupsophus*  
706 species and putative species from Villarrica (*Eupsophus* sp.) are indicated with different  
707 colors on the branches of the tree and with square bracket on the right of the bars. This  
708 limits correspond to the most congruent species delimitation scenario (see S2 table)

709

710 **Fig 4. Multi-locus species delimitation analyses. A)** species delimitation scenarios.  
711 Specimens were assigned to delimited species indicated in Fig 3. Abbreviations within  
712 parenthesis indicate the grouping tested in each scenario. *E. roseus*: ER, *E. migueli*: EM, *E.*  
713 *insularis*: EI, and *E. calcaratus*: EC, *E. altor*: EA, *E. contulmo*: ECO, *Eupsophus* sp.: EV,  
714 *E. nahuelbutensis*: EN, *E. septentrionalis*: ES. Some abbreviated localities from S1 Table  
715 were added to species abbreviation to indicate a specific locality grouping. Most congruent  
716 scenario is indicated in gray. **B)** probability, marginal likelihood (MLE), or score values  
717 generated for each scenario using different species delimitation approaches. Black arrow  
718 indicates the credible species hypotheses. For Tr2 lowest score indicates the better-  
719 delimited scenario. For STEM and BFD were plotted model probabilities and MLE values  
720 using stepping-stone sampling, respectively (see S4 and S5 Tables)

721

722 **Fig 5. Species tree and divergence times of *Eupsophus*.** This cladogram illustrates the  
723 posterior distribution of species trees inferred with BEAST based on the most congruent  
724 species delimitation scenario (Figs 3 and 4, S2 Table). High colour density is indicative of  
725 areas in the species trees with high topology agreement. Different colours represent  
726 different topologies. Consensus species tree are coloured in blue. Nodal values are  
727 Bayesian posterior probability (BEAST) and bootstrap proportions (SVDquartets). Mean  
728 divergence dates in million years and 95% credible intervals are indicated (below the  
729 support values).

730

731 **S1 Table. Sampling locations of *Eupsophus* species.** Coordinates, sample size (N),  
732 corresponding species according to Frost [33] and map number from Fig 1 are indicated.  
733 Species used as outgroup are also listed (gray cells).

734

735 **S2 Table. Sites characterization, partitioning schemes, and nucleotide substitution**  
736 **models for sequences used in this study.** Conservative (C), variable (V), informative (I)  
737 and total sites for each marker are indicated. Partitioning schemes, and nucleotide  
738 substitution models were determined using Partitionfinder, version 2.1.1 [52].

739

740 **S3 Table. Taxonomic index of congruence (*Ctax*) calculated for each pair of**  
741 **approaches.** Mean of all the *Ctax* values obtained involving a given approach (Mean *Ctax*)  
742 and total number of species supported by each approach (sp.) is indicated. Species  
743 delimitation approaches: Bayesian General Mixed Yule Coalescent model (bGMYC),  
744 multi-rate Poisson Tree Processes (mPTP), Tree Estimation using Maximum likelihood,  
745 (STEM), Bayesian Species Delimitation (BPP), Multi-locus Species Delimitation using a  
746 Trinomial Distribution Model (Tr2), and Bayes factor delimitation (BFD).

747

748 **S4 Table. Likelihood scores and Akaike's information criterion (AIC) results for**  
749 **STEM analysis (see Carstens and Dewey [16]).** Species delimitation scenarios for



750 *Eupsophus* species are indicated in Fig 3A. Species number (sp.), Log-likelihood of the  
751 species tree ( $-\ln L$ ), number of parameters ( $k$ ), AIC, AIC difference ( $\Delta i$ ), relative likelihood  
752 of model given the data ( $L$ ), and the model probabilities ( $w_i$ ) are indicated. Note the  
753 proximity between  $-\ln L$  from scenario 11 and 12.

754  
755 **S5 Table. Bayes factor delimitation results.** Marginal likelihood (MLE) and Bayes factor  
756 estimates for species delimitation scenarios indicated in Fig 3A. Species number (sp.) and  
757 values using path (PS) and stepping-stone (SS) sampling are indicated

758  
759 **S1 File. ABGD analyses using COI and concatenated dataset.** Distributions of pairwise  
760 distance, ABGD partition, and specimens grouping obtained from COI and concatenated  
761 data set are showed.



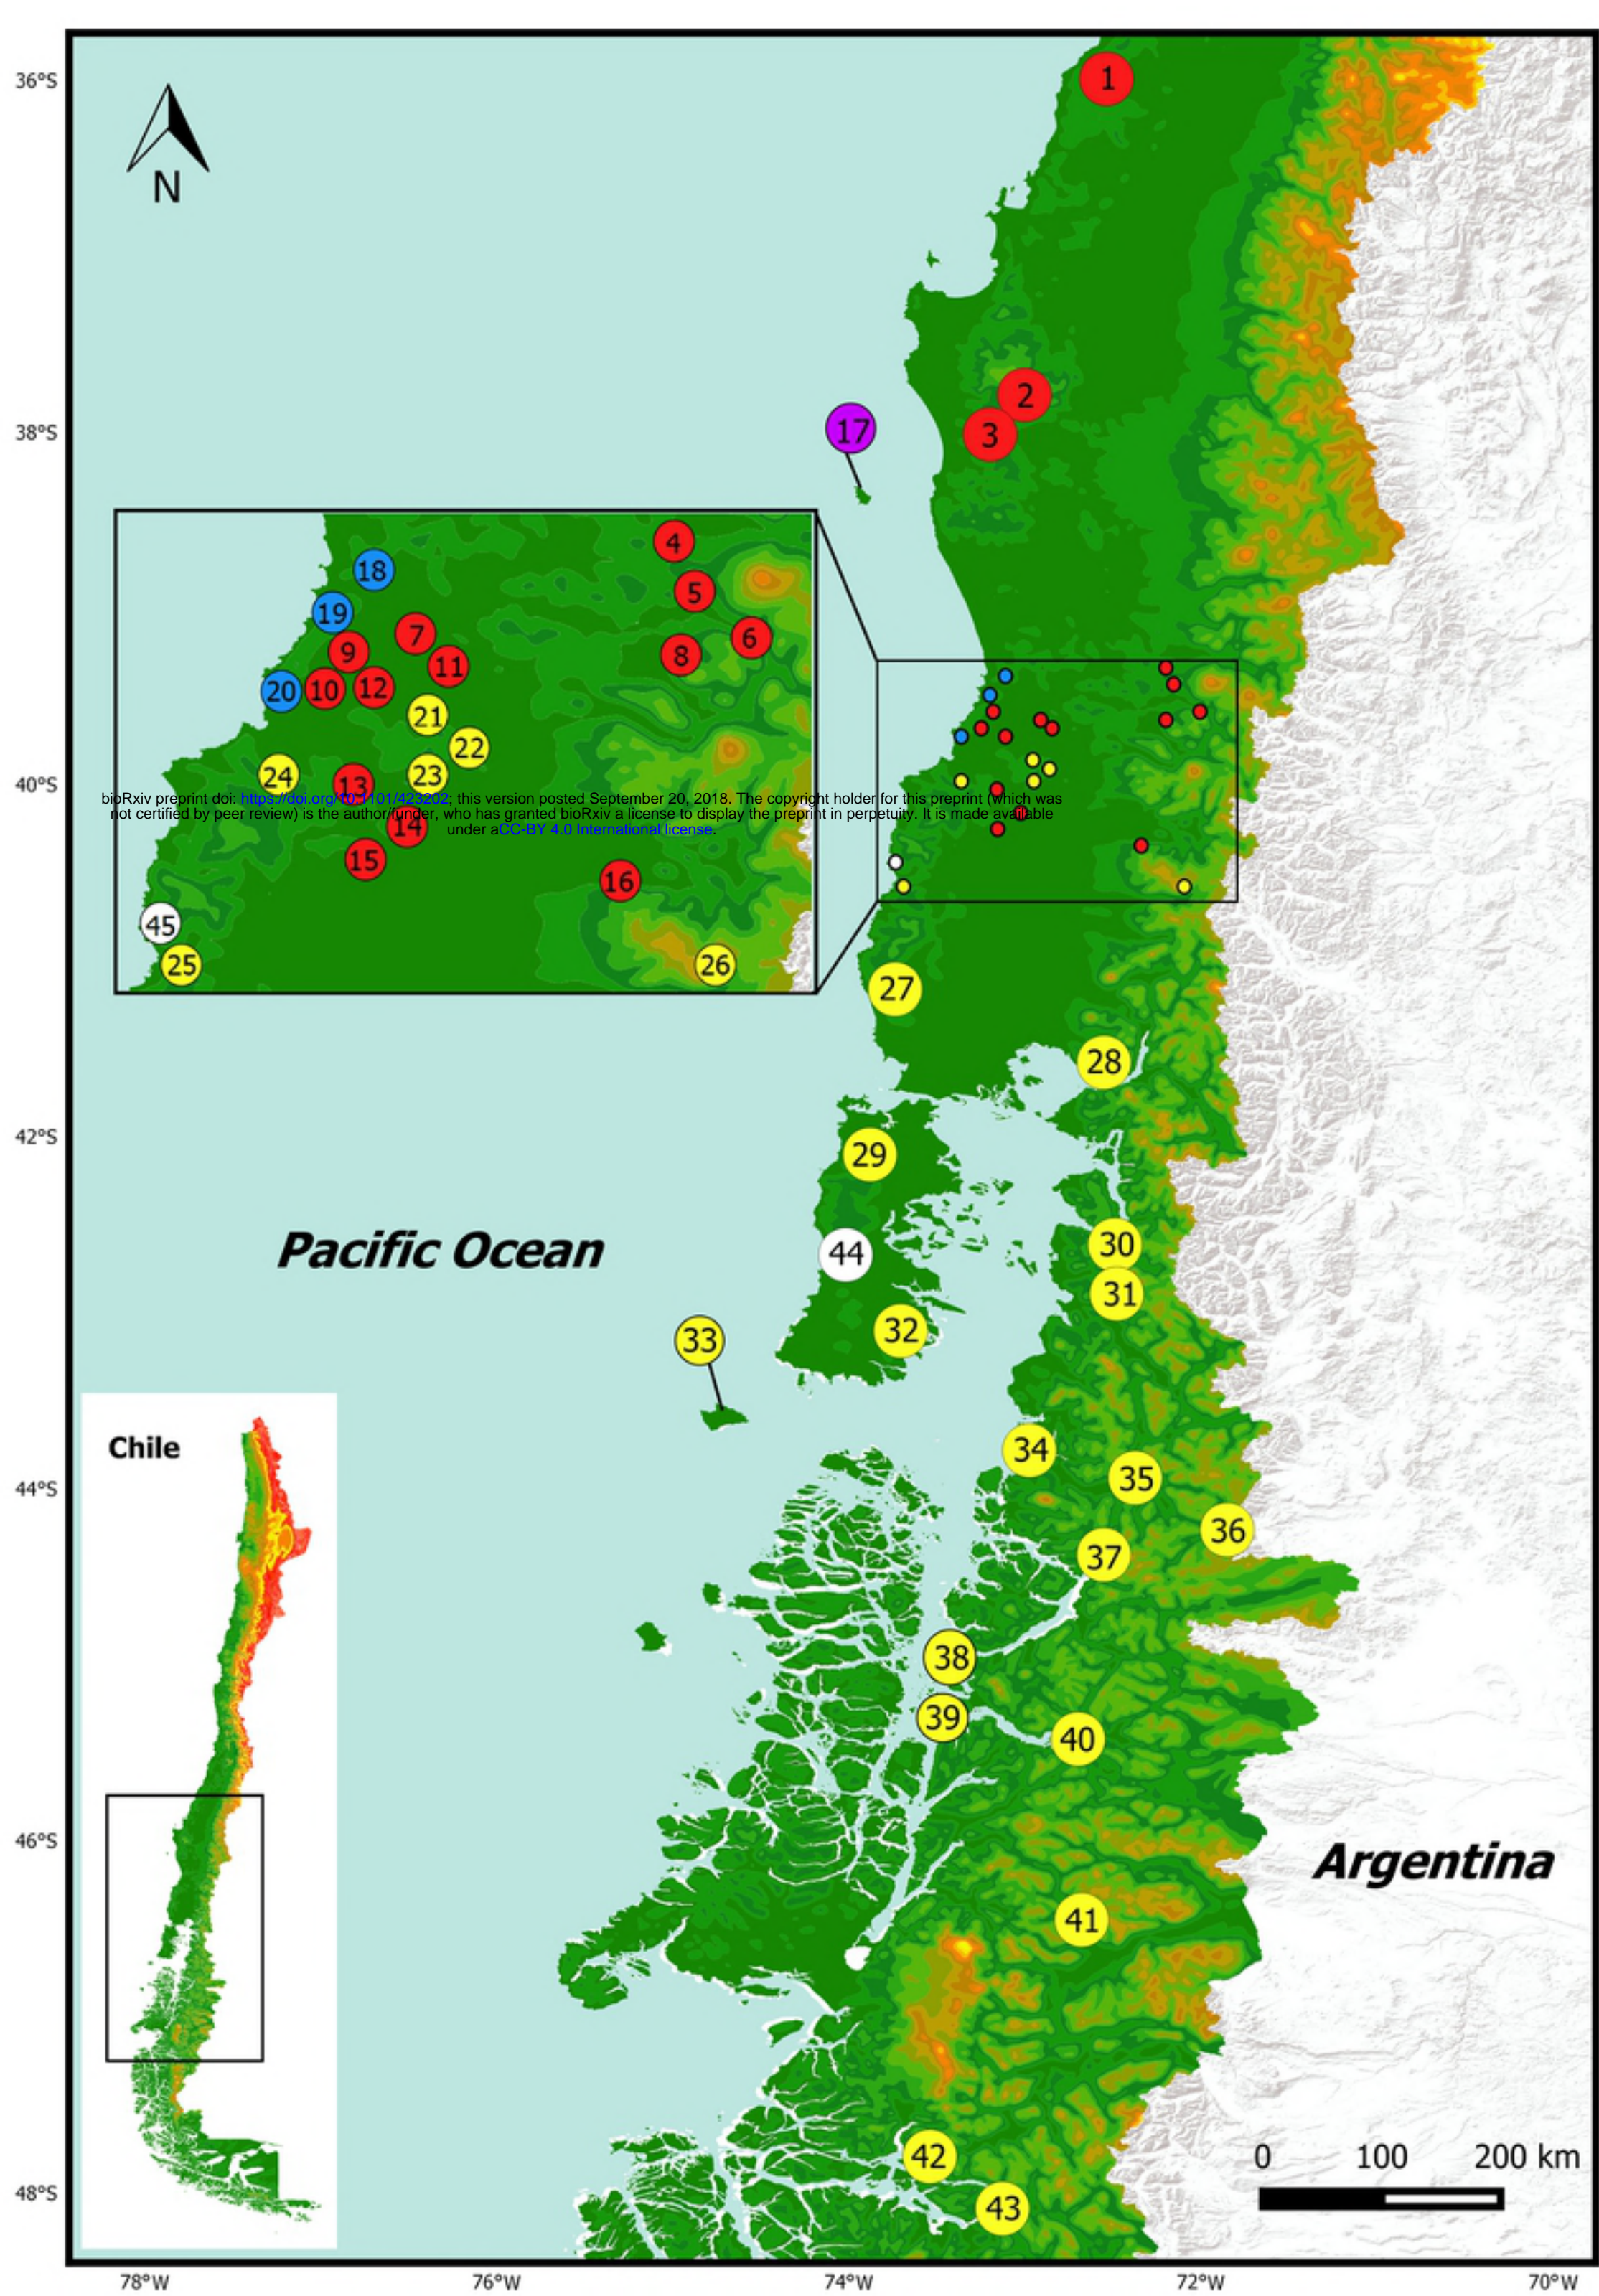



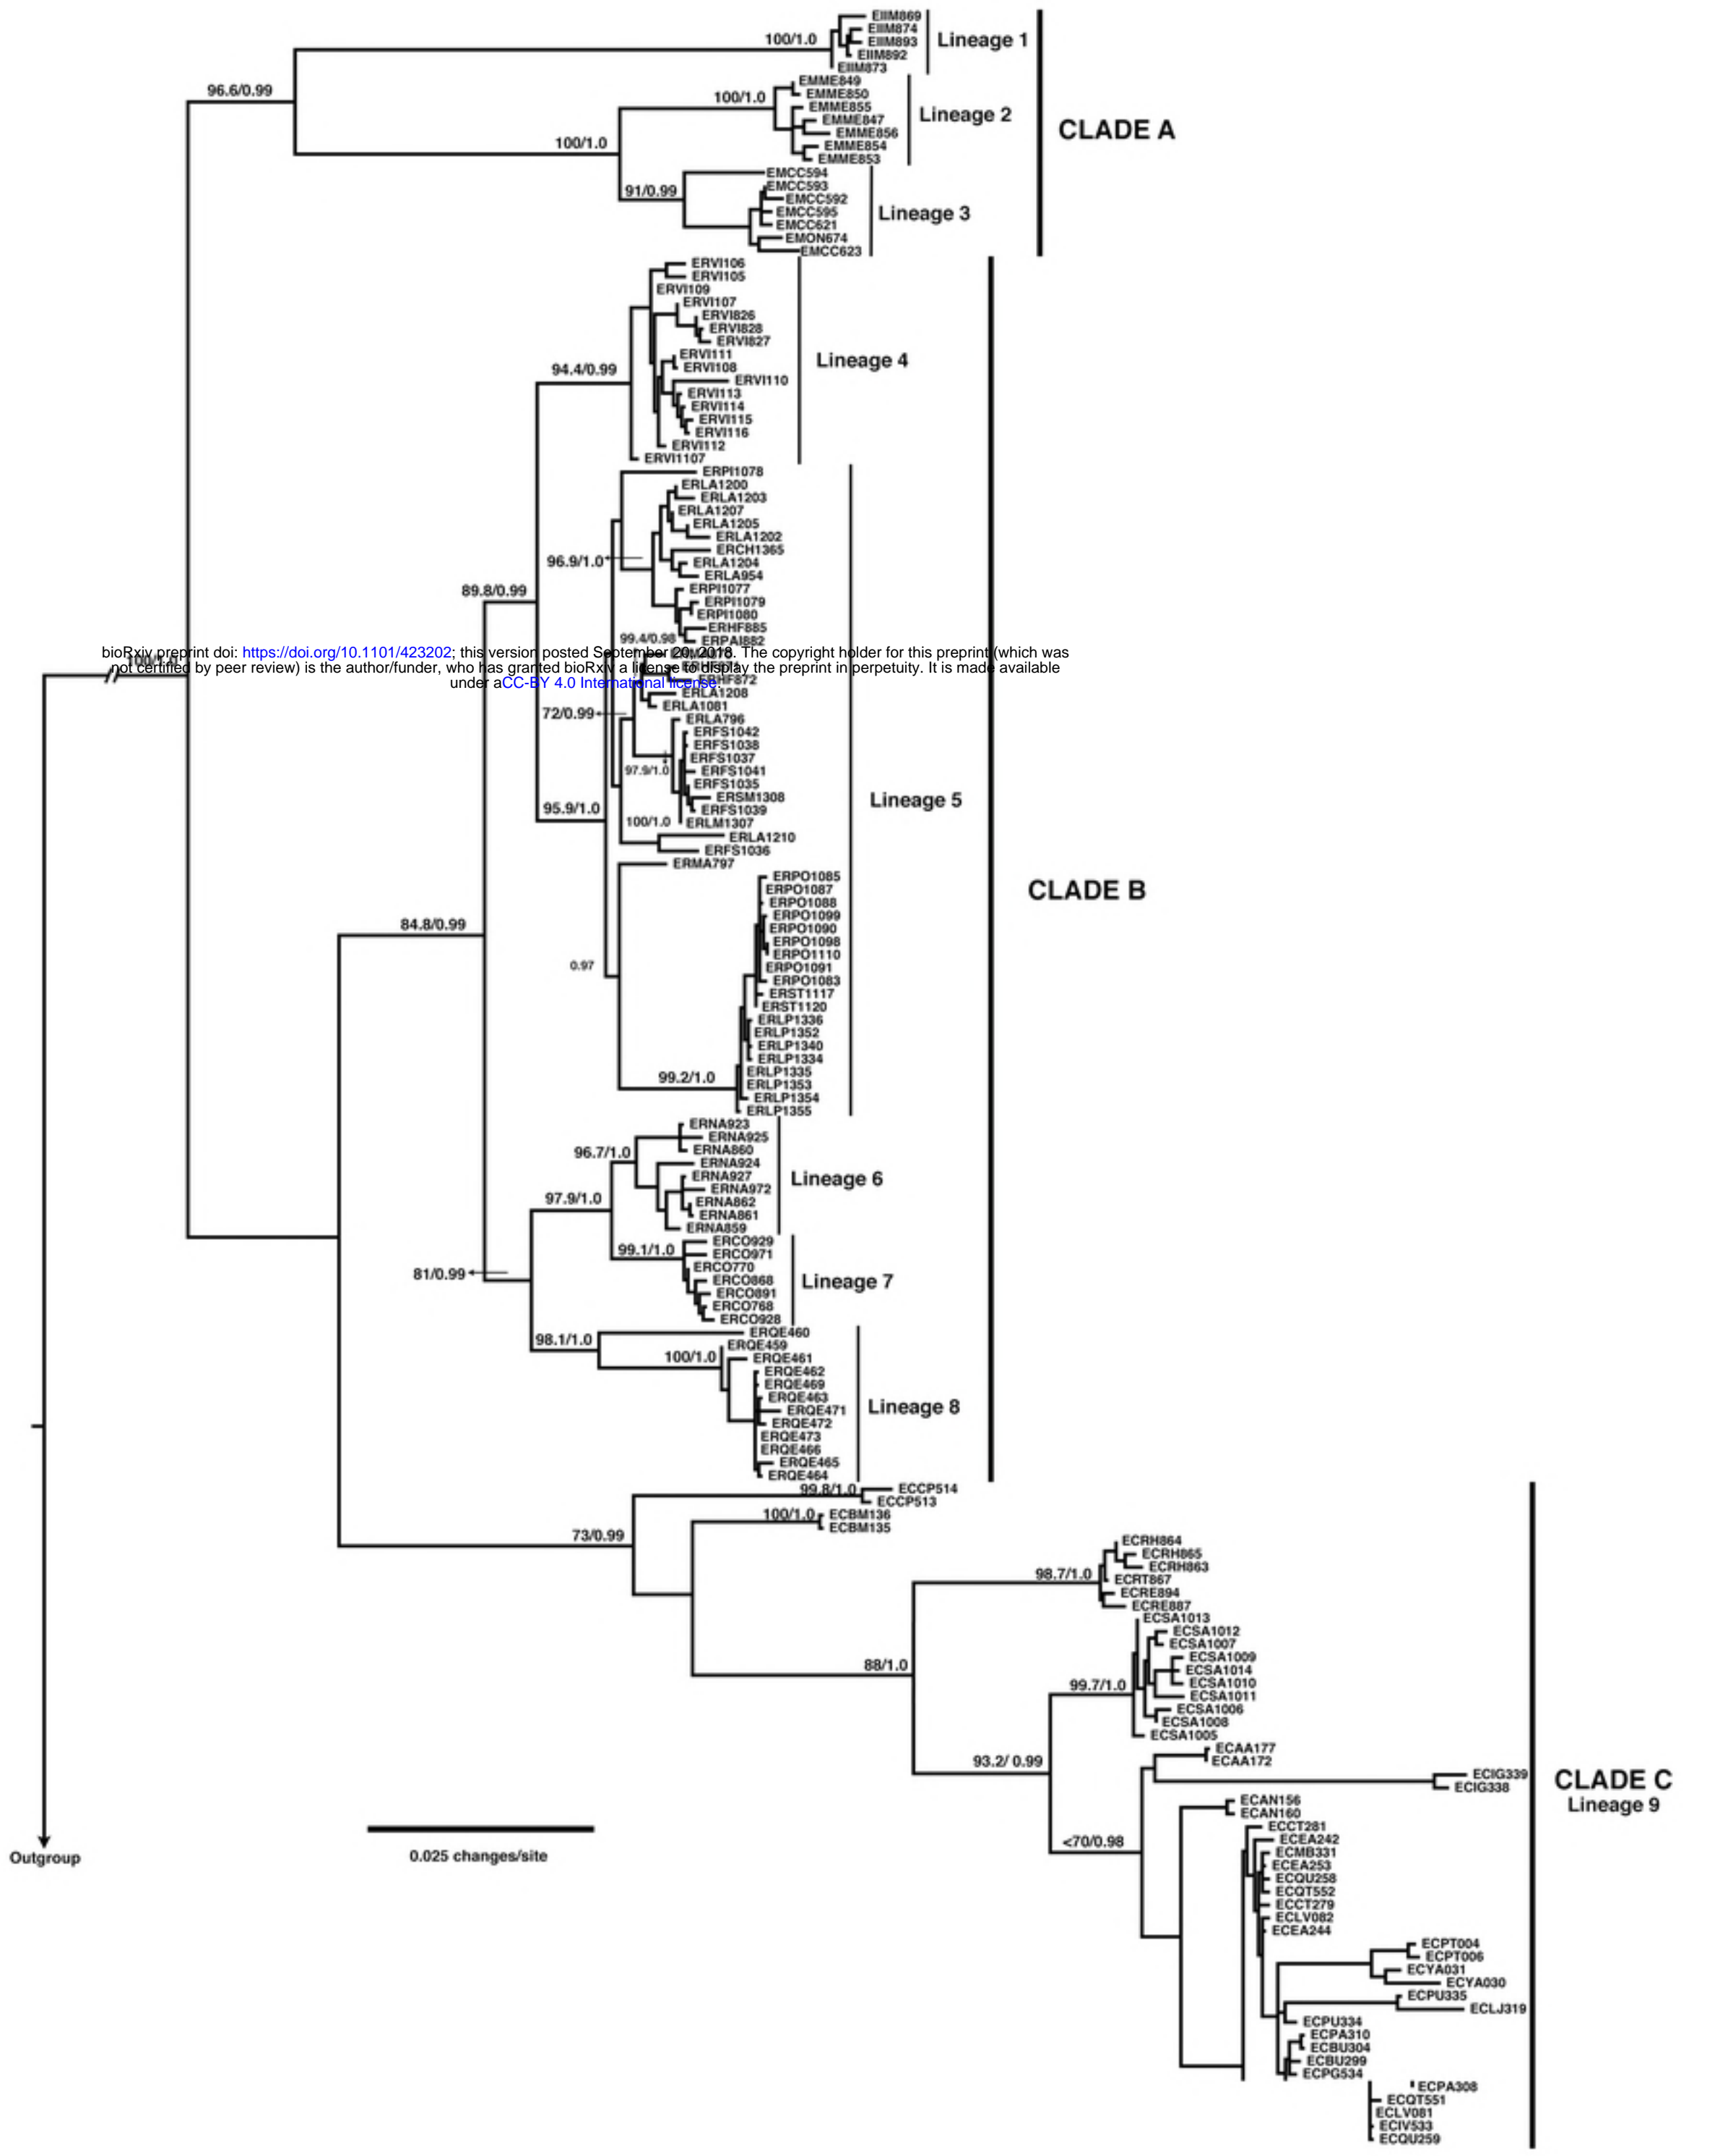

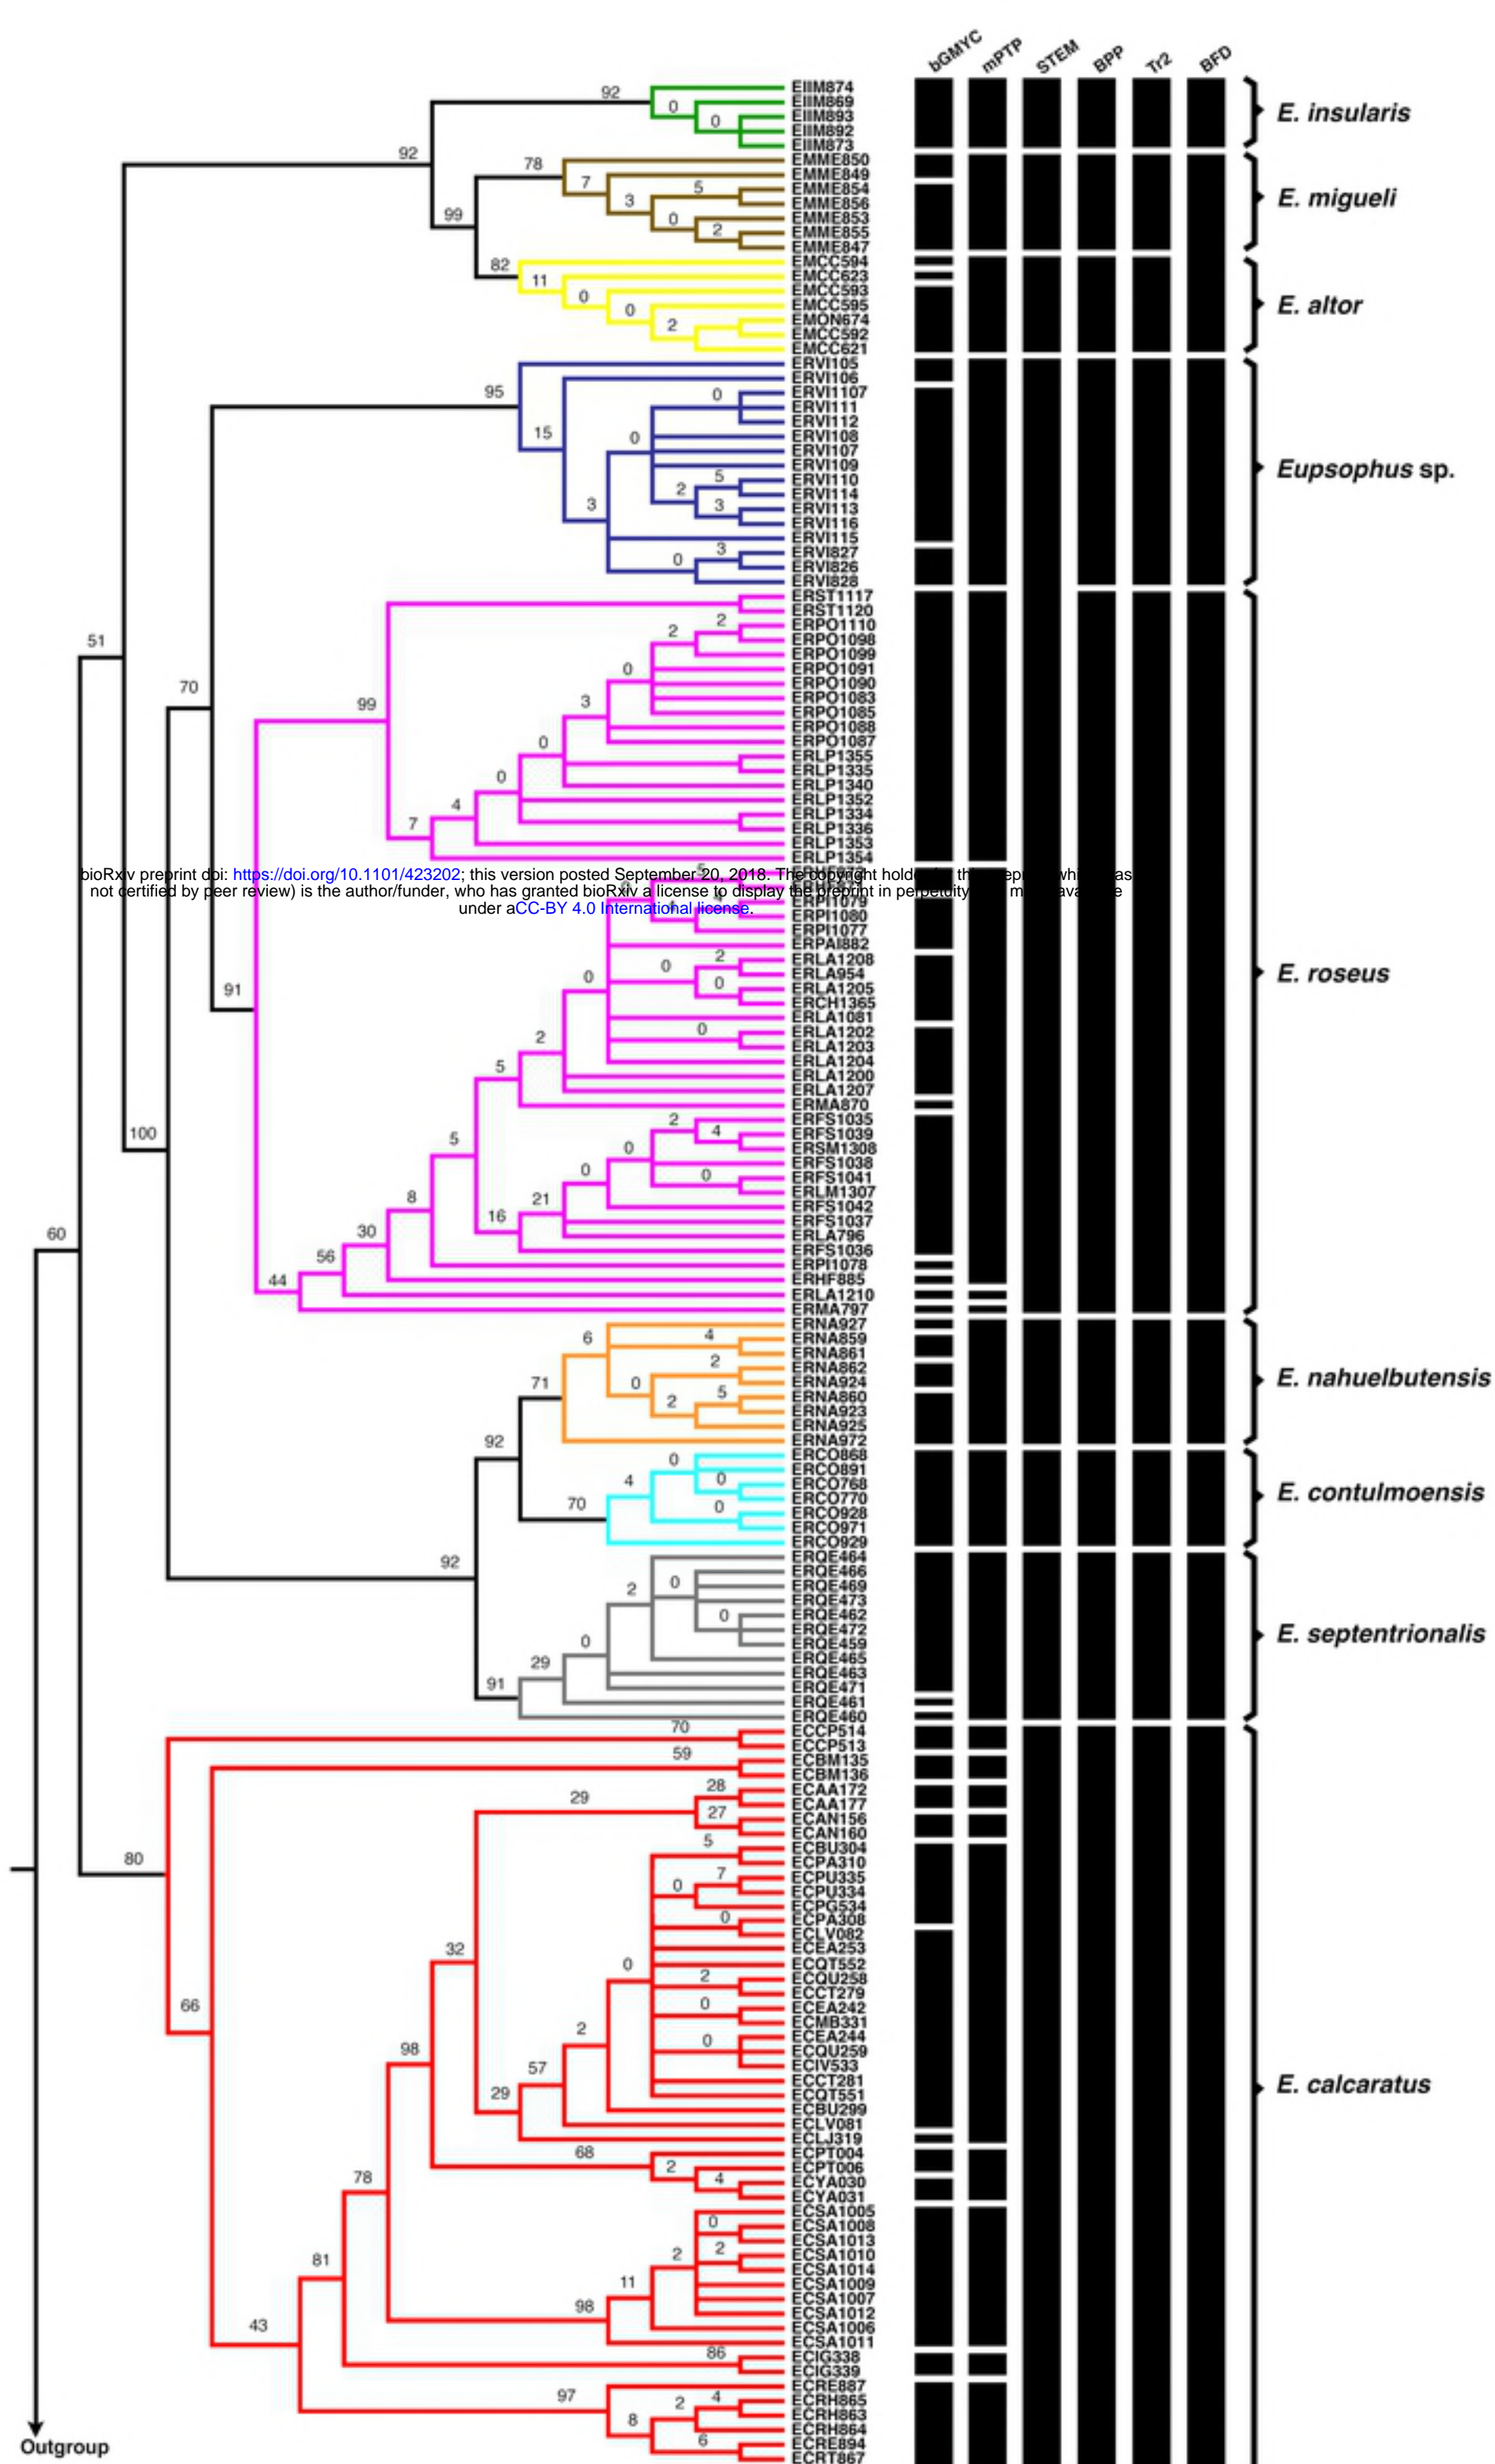



A

| No | Scenario                                                          | #sp. |
|----|-------------------------------------------------------------------|------|
| 1  | (EC) (ER, ECO, EN, ES, Esp) (EA, EM, EI)                          | 3    |
| 2  | (EC) (ER, Esp) (ECO, EN, ES ) (EA, EM, EI)                        | 4    |
| 3  | (EC) (ER, Esp, ECO, EN, ES, ) (EA, EM) (EI)                       | 4    |
| 4  | (EC) (ER, Esp) (ECO, EN, ES) (EA, EM) (EI)                        | 5    |
| 5  | (EC) (ER, Esp) (ECO, EN) (ES) (EA, EM) (EI)                       | 6    |
| 6  | (EC) (ER, Esp) (ECO, EN, ES ) (EA) (EM) (EI)                      | 6    |
| 7  | (EC) (ER, Esp) (ECO, EN) (ES) (EA) (EM) (EI)                      | 7    |
| 8  | (EC) (ER, Esp) (ECO) (EN) (ES) (EA, EM) (EI)                      | 7    |
| 9  | (EC) (ER) (Esp) (ECO, EN) (ES) (EA) (EM) (EI)                     | 8    |
| 10 | (EC) (ER) (Esp) (ECO) (EN) (ES) (EA, EM) (EI)                     | 8    |
| 11 | (EC) (ER, Esp) (ECO) (EN)(ES)(EA)(EM)(EI)                         | 8    |
| 12 | (EC) (ER) (Esp) (ECO) (EN) (ES) (EA) (EM) (EI)                    | 9    |
| 13 | (EC) (ER) (ERST, ERPO, ERLP) (Esp) (ECO) (EN) (ES) (EA) (EM) (EI) | 10   |

B

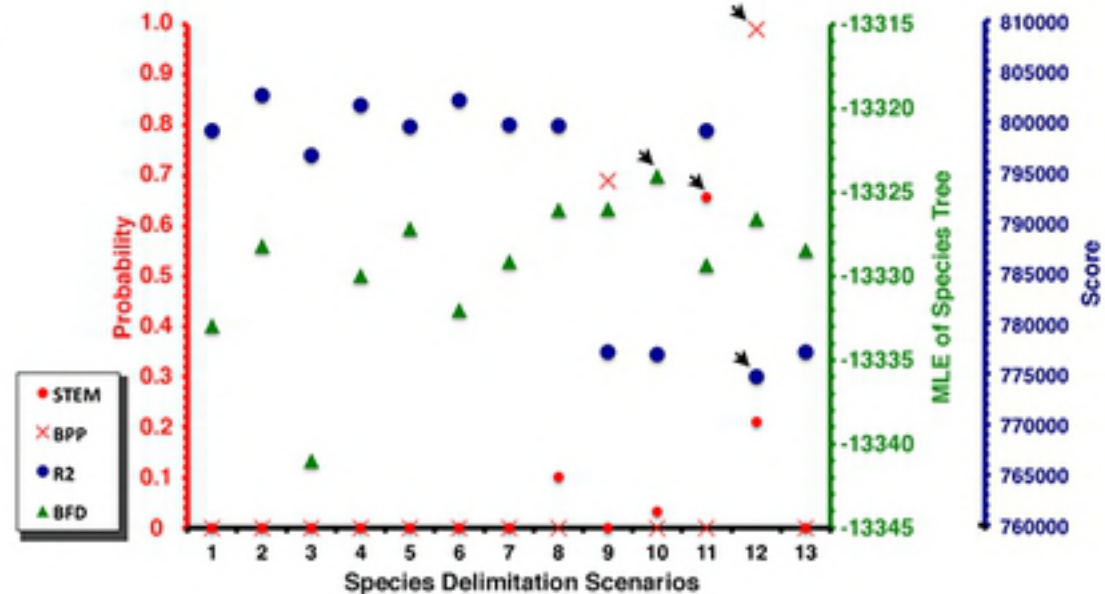

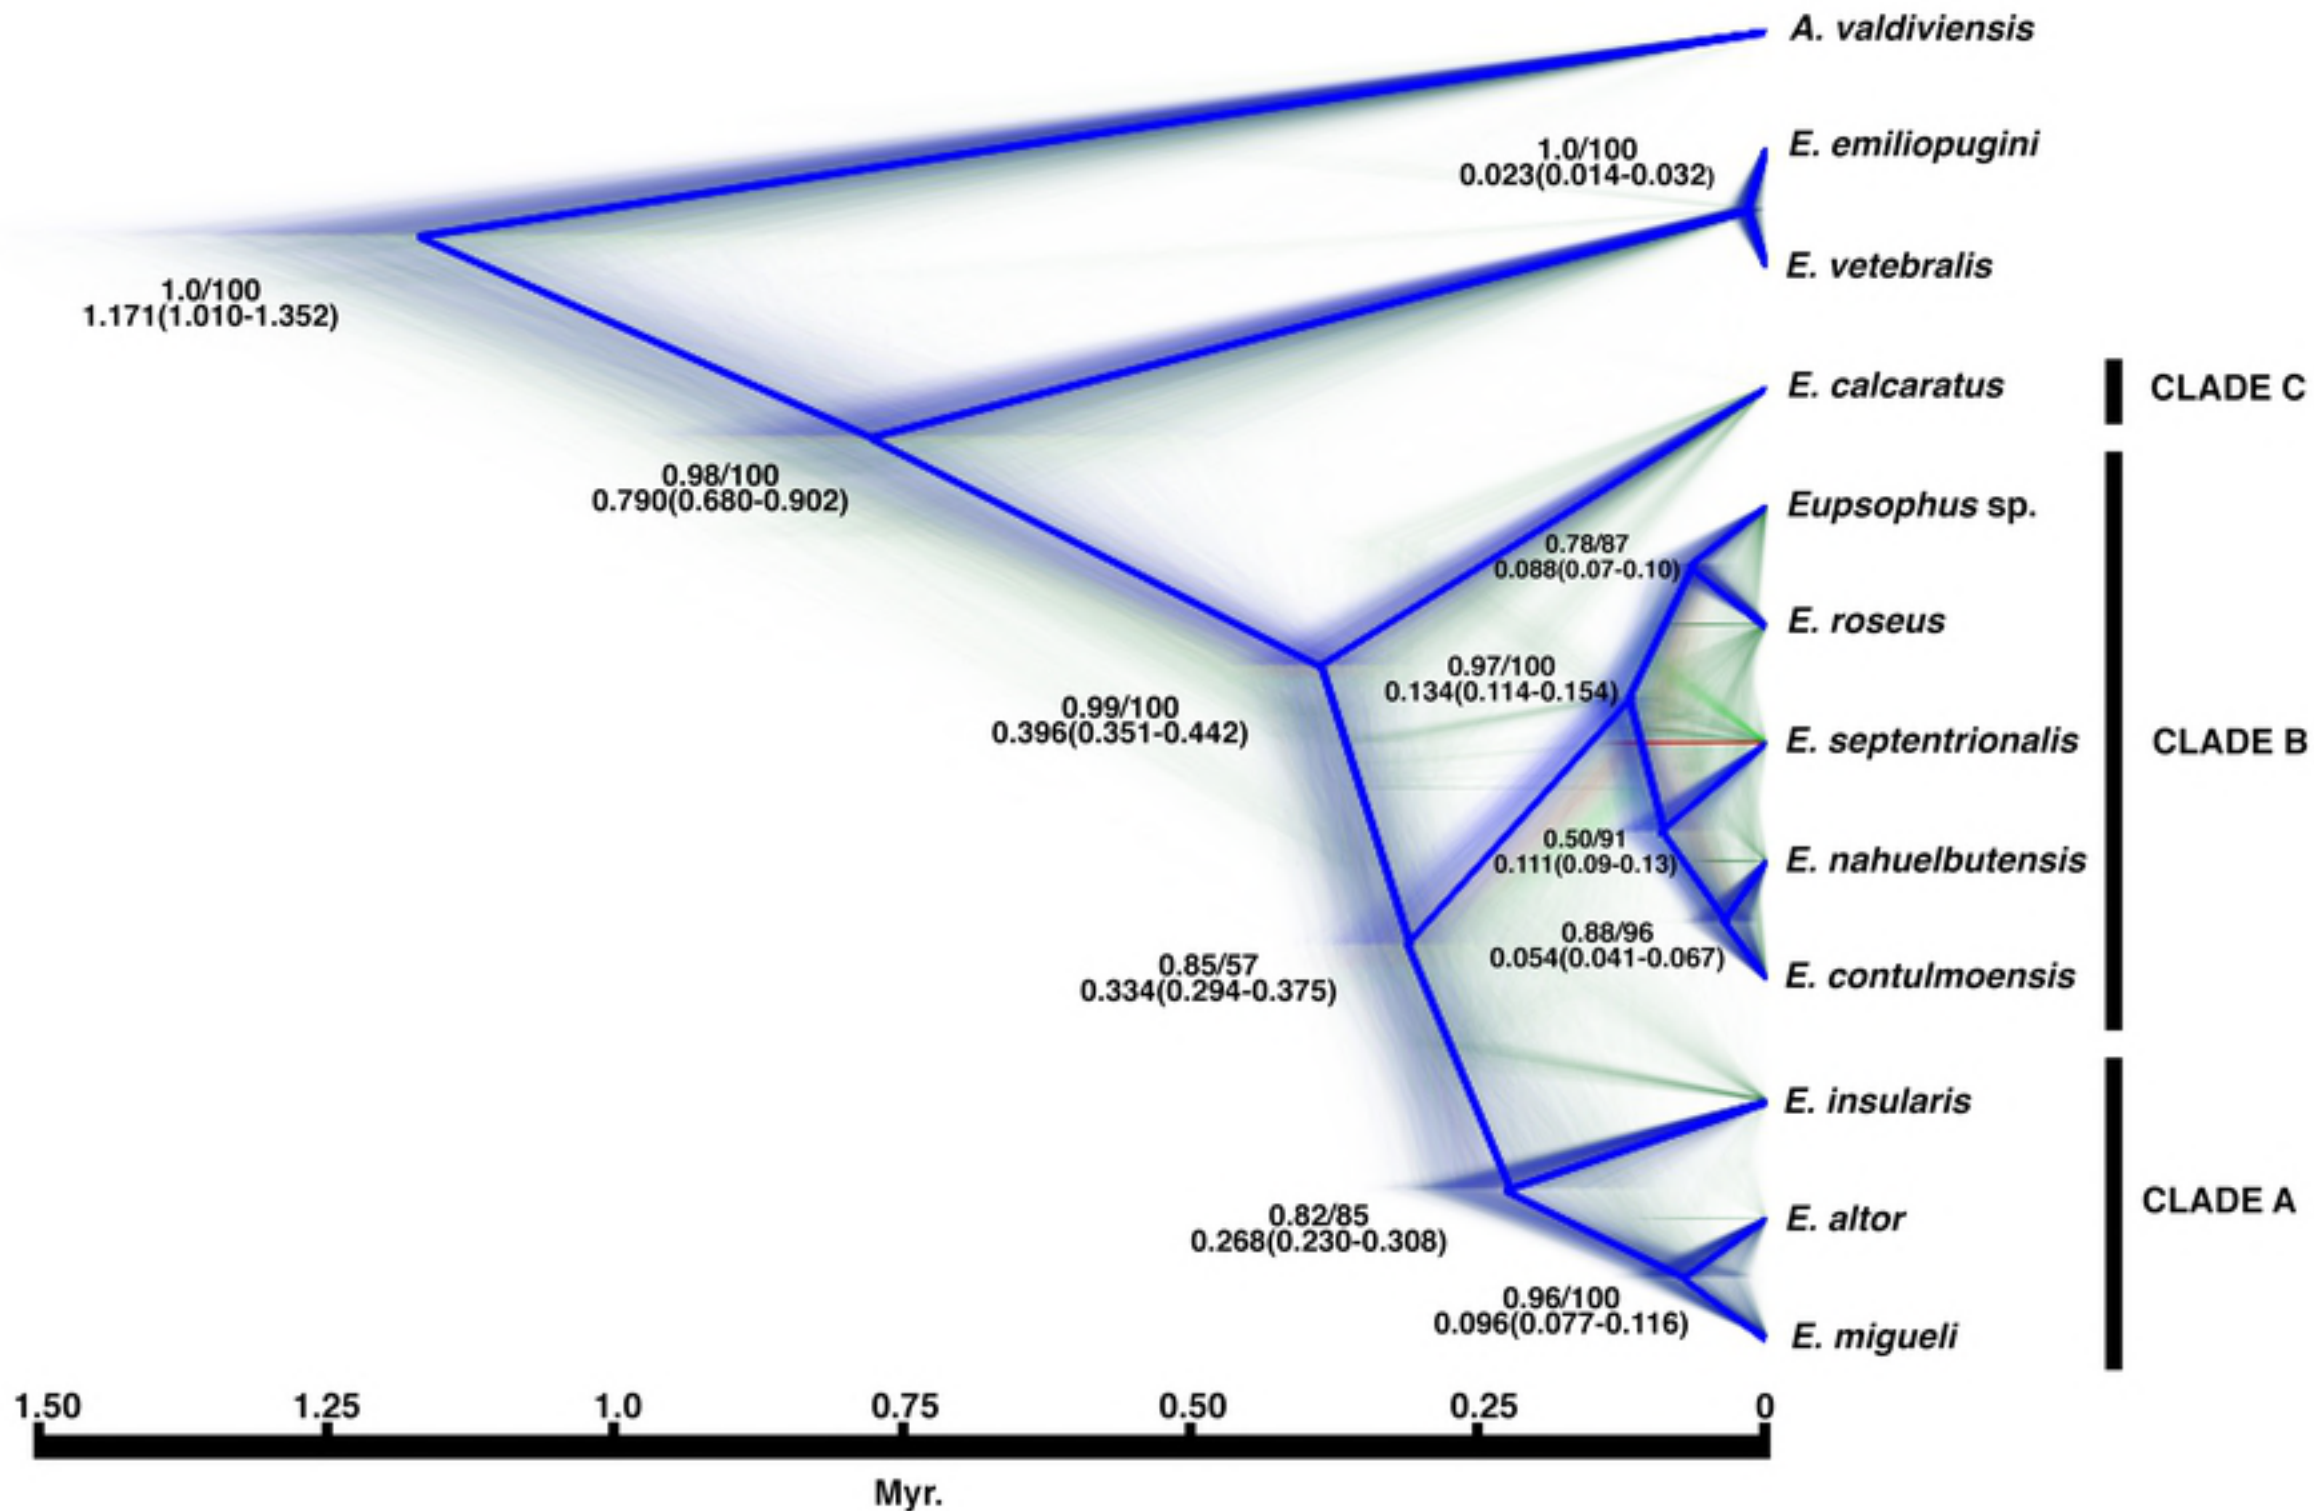

Source: https://www.biorxiv.org/content/10.1101/423202v1.full.pdf
